# Supplementary material for: Intermolecular proton transfer in cyclic carbonate synthesis from epoxide and carbon dioxide catalyzed by azaphosphatranes: a DFT mechanistic study
Source: Royal Society of Chemistry journal article supplement (doi:10.1039/c4ra11081a), 2015-01-01
Supplement: c4ra11081a1.pdf [file c4ra11081a1.pdf]

# Intermolecular Proton Transfer in Cyclic Carbonate Synthesis from Epoxide and Carbon Dioxide Catalyzed by Azaphosphatranes: A DFT Mechanistic Study

Zhiqiang Zhang,<sup>a</sup> Liancai Xu <sup>\*a</sup> and Wenkai Feng <sup>a</sup>

<sup>a</sup> Department of Material and Chemical Engineering, Zhengzhou University of Light Industry. E-mail: miss\_xulc@126.com

**Electronic Supporting Information**

## Computational Methods

All calculations were carried out with use of Gaussian 09 software package.<sup>1</sup> The B3LYP exchange-correlation functional<sup>2-5</sup> was used in all cases. For the geometry optimization, the polarized split-valence 6-31G(d)<sup>6, 7</sup> basis set was employed for all atoms. All geometries of minima (intermediates) and transition states were optimized for gas phase molecules. The optimization was conducted with tight convergence criteria and an ultrafine grid. The transition states were confirmed by frequency analysis in which there is only one imaginary frequency for each transition state. To identify the minima connected to the transition states thus identified, the intrinsic reaction coordinate was followed in forward and reverse directions and the two resulting molecular geometries were used as starting points for subsequent geometry optimizations. For all molecular structures (intermediate or transition states), the calculated electronic energy was improved by a single-point calculation in which the 6-31G(d) basis was replaced by the better polarized valence triple- $\zeta$  type 6-311++G(2d,p).<sup>8-10</sup> The above calculations provided the electronic energies ( $E_{electron}$ ) under vacuum. To model the reaction energies more closed resembling experimental conditions, further terms were added, namely zero-point vibrational energy ( $ZPE$ ), thermal corrections to Gibbs energy ( $G_{correct,gas}$ ), solvation and entropic effects, as well as empirical dispersion corrections ( $G_{correct,sol}$ ). To calculate the zero-point vibrational energies, frequencies analysis was performed based on the optimized molecular geometries using the same basis set which was 6-31G(d), and the calculated harmonic frequencies were scaled by a factor of 0.9614 which was suggested by Scott.<sup>11</sup> The  $G_{correct,gas}$  were also calculated with the scaled harmonic frequencies. Solvent effect was included by estimating the Gibbs energies of solvation for all intermediates and transition states using a continuum solvation model SMD.<sup>12</sup> This model is an universal solvation model which is applicable for any charged or uncharged solute in any solvent or liquid medium for which a few key descriptors are known (in particular, dielectric constant, refractive index, bulk surface tension, and acidity and basicity parameters).<sup>12</sup> This model is adopted for the object reaction. The Gibbs energy of solvation for an intermediate or transition state was calculated by taking the difference of resulting energies between gas phase and SMD calculation based on the same geometry optimized at gas phase. The Grimme's D3 parametrization<sup>13</sup> was used to calculate the dispersion correction for all minima and transition states. The calculation for dispersion correction ( $E_{dispersion}$ ) was also performed using 6-31G(d) basis sets based on the geometry optimized at gas phase.

For an intermediate or transition state, the Gibbs energy in gas phase ( $G_{gas}$ ) was calculated as equation (1):

$$G_{gas} = E_{electron} + E_{dispersion} + ZPE + G_{correct,gas} \quad (1)$$

While the Gibbs energy in solution phase ( $G_{sol}$ ) was calculated as equation (2):

$$G_{sol} = G_{gas} + G_{correct,sol} \quad (2)$$

Where the empirical dispersion correction has been included in the  $G_{correct,sol}$ .

## References:

1. M. J. Frisch, G. W. Trucks, H. B. Schlegel, G. E. Scuseria, M. A. Robb, J. R. Cheeseman, G. Scalmani, V. Barone, B. Mennucci, G. A. Petersson, H. Nakatsuji, M. Caricato, X. Li, H. P. Hratchian, A. F. Izmaylov, J. Bloino, G. Zheng, J. L. Sonnenberg, M. Hada, M. Ehara, K. Toyota, R. Fukuda, J. Hasegawa, M. Ishida, T. Nakajima, Y. Honda, O. Kitao, H. Nakai, T. Vreven, J. J. A. Montgomery, J. E. Peralta, F. Ogliaro, M. Bearpark, J. J. Heyd, E. Brothers, K. N. Kudin, V. N. Staroverov, T. Keith, R. Kobayashi, J. Normand, K. Raghavachari, A. Rendell, J. C. Burant, S. Iyengar, J. Tomasi, M. Cossi, N. Rega, J. M. Millam, M. Klene, J. E. Knox, J. B. Cross, V. Bakken, C. Adamo, J. Jaramillo, R. Gomperts, R. E. Stratmann, O. Yazyev, A. J. Austin, R. Cammi, C. Pomelli, J. W. Ochterski, R. L. Martin, K. Morokuma, V. G. Zakrzewski, G. A. Voth, P. Salvador, J. J. Dannenberg, S. Dapprich, A. D. Daniels, O. Farkas, J. B. Foresman, J. V. Ortiz, J. Cioslowski and D. J. Fox, Gaussian, Inc., Wallingford CT, 2013.
2. S. H. Vosko, L. Wilk and M. Nusair, *Canadian Journal of Physics*, 1980, **58**, 1200-1211.
3. C. Lee, W. Yang and R. G. Parr, *Physical Review B*, 1988, **37**, 785-789.
4. A. D. Becke, *The Journal of Chemical Physics*, 1993, **98**, 5648-5652.
5. P. J. Stephens, F. J. Devlin, C. F. Chabalowski and M. J. Frisch, *J Phys Chem*, 1994, **98**, 11623-11627.
6. G. A. Petersson, A. Bennett, T. G. Tensfeldt, M. A. Al - Laham, W. A. Shirley and J. Mantzaris, *The Journal of Chemical Physics*, 1988, **89**, 2193-2218.
7. G. A. Petersson and M. A. Al - Laham, *The Journal of Chemical Physics*, 1991, **94**, 6081-6090.
8. R. Krishnan, J. S. Binkley, R. Seeger and J. A. Pople, *The Journal of Chemical Physics*, 1980, **72**, 650-654.
9. L. A. Curtiss, M. P. McGrath, J. P. Blaudeau, N. E. Davis, R. C. Binning and L. Radom, *The Journal of Chemical Physics*, 1995, **103**, 6104-6113.
10. J.-P. Blaudeau, M. P. McGrath, L. A. Curtiss and L. Radom, *The Journal of Chemical Physics*, 1997, **107**, 5016-5021.
11. A. P. Scott and L. Radom, *J Phys Chem*, 1996, **100**, 16502-16513.
12. A. V. Marenich, C. J. Cramer and D. G. Truhlar, *J Phys Chem B*, 2009, **113**, 6378-6396.
13. S. Grimme, J. Antony, S. Ehrlich and H. Krieg, *J Chem Phys*, 2010, **132**, 154104.

## Formation of cyclic carbonate from epoxide and CO<sub>2</sub> without catalysts.

In order to test the role of the catalyst, the objective reaction was investigated using the same method but with the absent catalyst. The first step, namely the epoxide ring opening reaction, is found to be impossible without catalyst as illustrated in **Chart S1**, because the ring opened intermediate **7** does not really exist owing to the high reactivity of oxide anion. Molecular geometric optimizations for **7** always lead to a complex of **1** and chloride anion as illustrated.

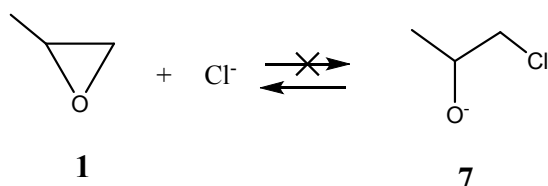

**Chart S1** Epoxide ring opening step for cyclic carbonates synthesis.

Thus three elementary reactions in the objective reaction were explored and discussed individually. The model for the second elementary reaction is **8** converting to CO<sub>2</sub> adduct **9**. The species **8** is protonated **7**. The Gibbs free energy profiles of this reaction were depicted in **Fig. S1a**.

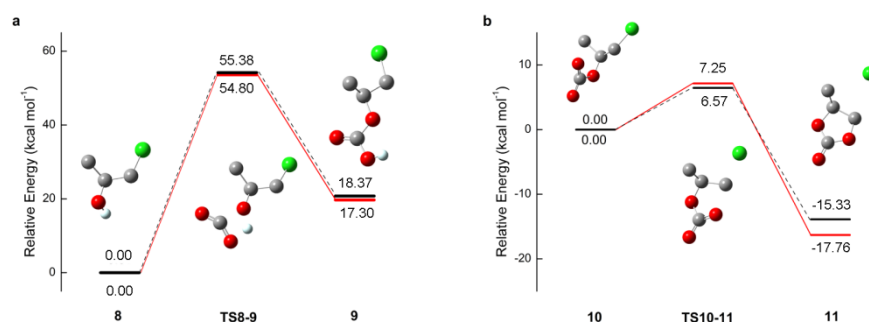

**Fig. S1** B3LYP/6-31G(d) optimized structures for cyclic carbonate synthesis from epoxide and carbon dioxide without catalyst. **a**) carbon dioxide addition step. **b**) carbonate ring-closure step. Hydrogens are omitted for clarity except for the one participating the proton transfer. All relative energies were calculated according to the law of Mass Conservation. —  $\Delta_r G_{gas}$ , —  $\Delta_r G_{sol}$ . Color code: C, gray; P, orange; Cl, green; O, red; N, navy; H, lightblue.

The calculated barriers ( $\Delta^\ddagger G_{gas} = 55.38$ ,  $\Delta^\ddagger G_{sol} = 54.80$  kcal mol<sup>-1</sup>) of this elementary reaction are extremely higher than that of the catalyzed reaction with catalyst **C2a** or **C1a**. The thirdly elementary reaction corresponds to the formation of **2**, whereas we have failed to locate the transition states corresponding to the conversion of **9** to **2**. The conversion of **9** to **2** seems to be impossible without intermolecular proton transfer. The conversion requires a proton leaving process, however, the proton in free stage is dynamically much unfavored. Thus we use **10**, the deprotonated **9**, as the reactant of the thirdly elementary reaction. The Gibbs energy profiles of the thirdly

elementary reaction were depicted in **Fig. S1b**. The calculated barrier ( $\Delta^\ddagger G_{gas} = 6.57$ ,  $\Delta^\ddagger G_{sol} = 7.25$  kcal mol<sup>-1</sup>) for the third step is about tenth of the barrier for the second step. The formation of **2** is therefore a fast process compared with the CO<sub>2</sub> addition process. Furthermore, the third step without catalyst is even faster than with catalysts. Thus, the CO<sub>2</sub> addition is generally the rate determining step in which catalyst with high proton affinity will accelerate the reaction rate. The catalytic activity is related to the alkalinity of the catalyst, and a catalyst with strong alkalinity may show high catalytic activity.

## Proton affinity of azaphosphatranes and their CO<sub>2</sub> inserted derivatives

**Table S1** The protonation Gibbs free energies of azaphosphatranes

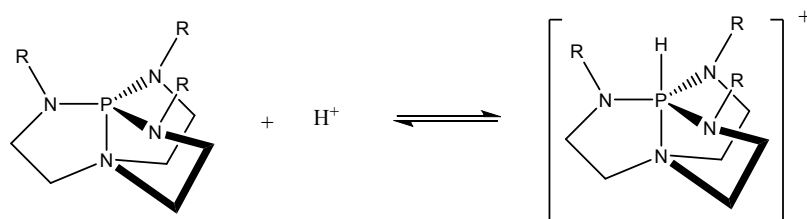

| <b>B</b>  | <b>A</b>  | R=                                                                                                   | $\Delta G_{sol}/\text{Hartree}$ | ${}^a\Delta\Delta G_{sol}/\text{kcal mol}^{-1}$ |
|-----------|-----------|------------------------------------------------------------------------------------------------------|---------------------------------|-------------------------------------------------|
| <b>15</b> | <b>12</b> | -CH <sub>3</sub>                                                                                     | -0.31475199                     | 0.00                                            |
| <b>17</b> | <b>18</b> | -CH <sub>2</sub> - 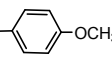 | -0.32049344                     | -3.60                                           |
| <b>19</b> | <b>20</b> | -CH <sub>2</sub> -t-C <sub>4</sub> H <sub>9</sub>                                                    | -0.31753482                     | -1.75                                           |

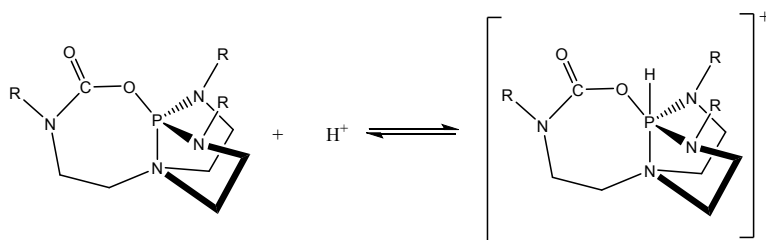

| <b>B</b>  | <b>A</b>  | R=                                                                                                     | $\Delta G_{sol}/\text{Hartree}$ | ${}^a\Delta\Delta G_{sol}/\text{kcal mol}^{-1}$ |
|-----------|-----------|--------------------------------------------------------------------------------------------------------|---------------------------------|-------------------------------------------------|
| <b>16</b> | <b>14</b> | -CH <sub>3</sub>                                                                                       | -0.29293879                     | 13.69                                           |
| <b>22</b> | <b>21</b> | -CH <sub>2</sub> - 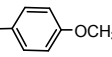 | -0.29511370                     | 12.32                                           |

$${}^a\Delta\Delta G_{sol} = \Delta_{A-B}G_{sol} - \Delta_{12-15}G_{sol}$$

## CO<sub>2</sub> insertion into the P–N bond of Catalyst C1a.

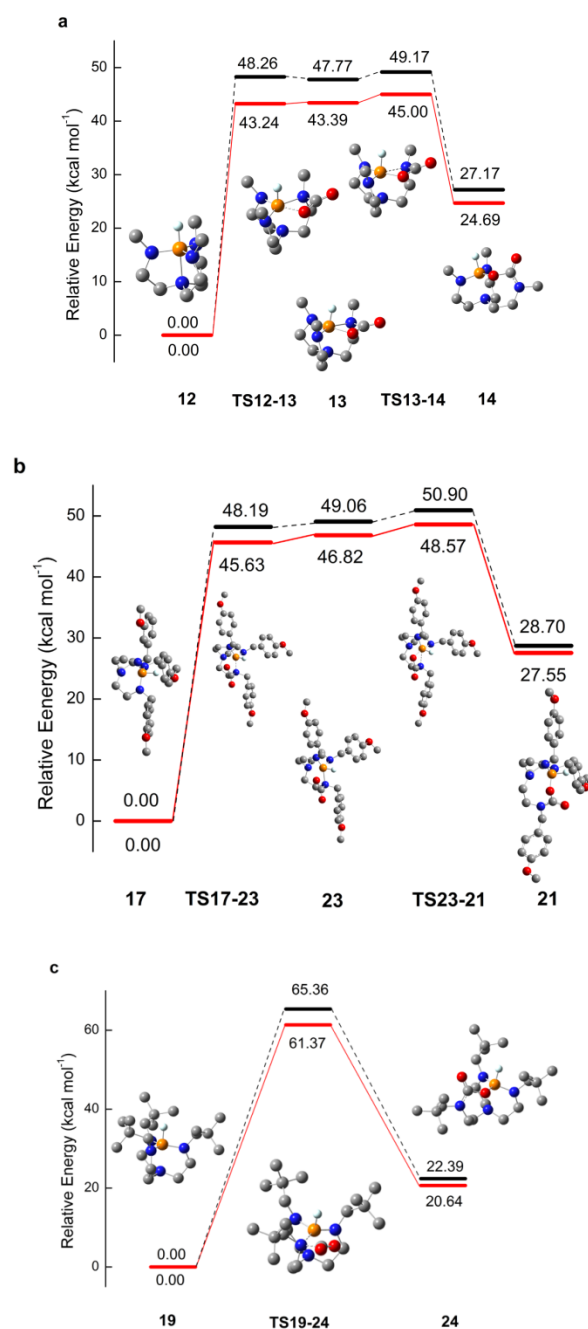

**Fig. S2** a) B3LYP/6-31G(d) optimized structures for CO<sub>2</sub> insertion into P–N bond of the acidic form of **C1a**. b) B3LYP/6-31G(d) optimized structures for CO<sub>2</sub> insertion into P–N bond of the acidic form of **C1b**. c) B3LYP/6-31G(d) optimized structures for CO<sub>2</sub> insertion into P–N bond of the acidic form of **C1c**. Hydrogens are omitted for clarity except for the P–H moiety of **C1a**–**C1c**. Each energy reference was calculated as the sum of corresponding azaphosphatrane and CO<sub>2</sub> and defined as zero. Other relative energies were calculated according to the law of Mass Conservation and with respect to corresponding reference. — Δ<sub>r</sub>G<sub>gas</sub>, — Δ<sub>r</sub>G<sub>sol</sub>. Color code: C, gray; P, orange; Cl, green; O, red; N, navy-blue; H, light-blue.

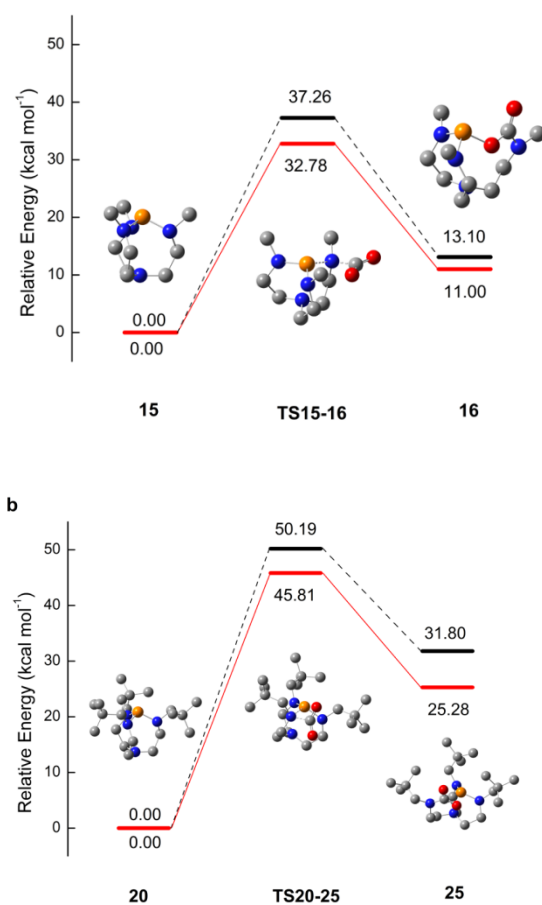

**Fig. S3 a)** B3LYP/6-31G(d) optimized structures for CO<sub>2</sub> insertion into P–N bond of the basic form of **C1a**. **b)** B3LYP/6-31G(d) optimized structures for CO<sub>2</sub> insertion into P–N bond of the acidic form of **C1c**. Each energy reference was calculated as the sum of corresponding azaphosphatrane and CO<sub>2</sub> and defined as zero. Other relative energies were calculated according the law of Mass Conservation and with respect to corresponding reference. —  $\Delta_r G_{gas}$ , - -  $\Delta_r G_{sol}$ . Color code: C, gray; P, orange; Cl, green; O, red; N, navy-blue.



## Energies and corrections to Gibbs free energy of all molecular structures

**Table S2** Electronic energies ( $E_{electron}$ ), zero-point vibrational energy ( $ZPE$ ), thermal corrections to Gibbs energy ( $G_{correct,gas}$ ) at 100 °C and 1.0 atm, solvent effect in toluene solution ( $G_{correct,sol}$ ), empirical dispersion corrections ( $E_{dispersion}$ ). All energies are given in Hartree.

| Structure             | $E_{electron}$ | ZPE      | $G_{correct,gas}$ | $G_{correct,sol}$ | $E_{dispersion}$ |
|-----------------------|----------------|----------|-------------------|-------------------|------------------|
| <b>CO<sub>2</sub></b> | -188.65033425  | 0.011145 | -0.026986         | -0.000068         | -0.000189        |
| <b>HCl</b>            | -460.83557820  | 0.006436 | -0.023322         | -0.003875         | -0.000003        |
| <b>H+</b>             | 0.00000000     | 0.000000 | -0.013178         | -0.127054         | 0.000000         |
| <b>C1a</b>            | -1376.98465020 | 0.317106 | -0.059999         | -0.027459         | -0.048884        |
| <b>C1b</b>            | -2414.00460490 | 0.646282 | -0.109350         | -0.046902         | -0.100228        |
| <b>C1c</b>            | -1848.87971208 | 0.644636 | -0.088866         | -0.034243         | -0.108307        |
| <b>C2a</b>            | -1565.59230689 | 0.328412 | -0.066668         | -0.027856         | -0.056847        |
| <b>C2b</b>            | -2602.62880400 | 0.661378 | -0.113834         | -0.051082         | -0.107101        |
| <b>1</b>              | -193.17299603  | 0.082617 | -0.034714         | -0.004746         | -0.004084        |
| <b>2</b>              | -381.84539003  | 0.099451 | -0.040469         | -0.009078         | -0.007947        |
| <b>TS1-3</b>          | -1570.11444463 | 0.398927 | -0.078226         | -0.045548         | -0.055654        |
| <b>3</b>              | -1570.18255331 | 0.398792 | -0.079932         | -0.016228         | -0.056382        |
| <b>TS3-4</b>          | -1758.79470910 | 0.407967 | -0.081130         | -0.020521         | -0.069214        |
| <b>4</b>              | -1758.81552002 | 0.415334 | -0.081367         | -0.029367         | -0.062288        |
| <b>TS4-2</b>          | -1758.79356245 | 0.415350 | -0.080351         | -0.037940         | -0.061607        |
| <b>TS1-5</b>          | -1758.73706325 | 0.412896 | -0.083929         | -0.049440         | -0.063610        |
| <b>5</b>              | -1758.83507702 | 0.414407 | -0.083738         | -0.018407         | -0.062667        |
| <b>TS5-6</b>          | -1947.43440884 | 0.423795 | -0.084954         | -0.024606         | -0.075764        |
| <b>6</b>              | -1947.48068836 | 0.429171 | -0.088640         | -0.019933         | -0.066941        |
| <b>TS6-2</b>          | -1947.41681316 | 0.428574 | -0.087826         | -0.040025         | -0.067850        |
| <b>8</b>              | -654.05214866  | 0.096262 | -0.039994         | -0.008030         | -0.008801        |
| <b>TS8-9</b>          | -842.62781804  | 0.105527 | -0.047530         | -0.009023         | -0.012969        |
| <b>9</b>              | -842.69331862  | 0.111165 | -0.047139         | -0.009797         | -0.012472        |
| <b>10</b>             | -842.15447085  | 0.097952 | -0.046419         | -0.049058         | -0.013018        |
| <b>TS10-11</b>        | -842.14603032  | 0.097761 | -0.044777         | -0.047962         | -0.012441        |
| <b>11</b>             | -842.18099642  | 0.099988 | -0.046933         | -0.052941         | -0.012436        |
| <b>12</b>             | -916.55179473  | 0.316352 | -0.056477         | -0.052802         | -0.040082        |
| <b>TS12-13</b>        | -1105.13972880 | 0.329852 | -0.058503         | -0.060880         | -0.053066        |
| <b>13</b>             | -1105.14057077 | 0.330508 | -0.059565         | -0.059841         | -0.052618        |
| <b>TS13-14</b>        | -1105.13986459 | 0.330093 | -0.058853         | -0.059511         | -0.051383        |
| <b>14</b>             | -1105.17566895 | 0.331008 | -0.062044         | -0.056824         | -0.048364        |
| <b>15</b>             | -916.12174905  | 0.301174 | -0.058770         | -0.010580         | -0.039895        |
| <b>TS15-16</b>        | -1104.73168884 | 0.315968 | -0.060021         | -0.017788         | -0.050487        |
| <b>16</b>             | -1104.77053260 | 0.316190 | -0.063704         | -0.013987         | -0.046688        |
| <b>17</b>             | -1953.57900478 | 0.645590 | -0.107160         | -0.065856         | -0.091467        |
| <b>18</b>             | -1953.14014202 | 0.631133 | -0.106058         | -0.030167         | -0.091940        |

|                |                |          |           |           |           |
|----------------|----------------|----------|-----------|-----------|-----------|
| <b>19</b>      | -1388.45173775 | 0.643823 | -0.084473 | -0.055926 | -0.101548 |
| <b>20</b>      | -1388.01821396 | 0.628632 | -0.085793 | -0.016108 | -0.100612 |
| <b>21</b>      | -2142.20529279 | 0.660832 | -0.109652 | -0.067929 | -0.100507 |
| <b>22</b>      | -2141.78933521 | 0.646171 | -0.110928 | -0.032697 | -0.100414 |
| <b>TS17-23</b> | -2142.16231287 | 0.659032 | -0.106829 | -0.070194 | -0.107168 |
| <b>23</b>      | -2142.16409709 | 0.659865 | -0.107873 | -0.069619 | -0.105915 |
| <b>TS23-21</b> | -2142.16404679 | 0.659650 | -0.105926 | -0.069747 | -0.104622 |
| <b>TS19-24</b> | -1577.01006966 | 0.656562 | -0.089090 | -0.062362 | -0.113541 |
| <b>24</b>      | -1577.08556450 | 0.658010 | -0.090789 | -0.058787 | -0.106276 |
| <b>TS20-25</b> | -1576.60455995 | 0.642676 | -0.089744 | -0.023160 | -0.110742 |
| <b>25</b>      | -1576.63866420 | 0.643564 | -0.092517 | -0.026565 | -0.104060 |

**Optimized Cartesian coordinates (Å) from B3LYP/6-31G(d) calculations.**

Structure CO<sub>2</sub>

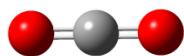

|   |          |          |           |
|---|----------|----------|-----------|
| C | 0.000000 | 0.000000 | 0.000000  |
| O | 0.000000 | 0.000000 | 1.169160  |
| O | 0.000000 | 0.000000 | -1.169160 |

## Structure of HCl

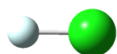

|    |          |          |           |
|----|----------|----------|-----------|
| Cl | 0.000000 | 0.000000 | 0.071641  |
| H  | 0.000000 | 0.000000 | -1.217896 |

Structure of C1a

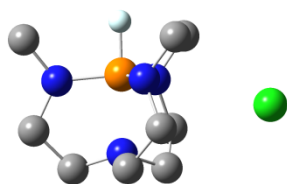

|    |           |           |           |
|----|-----------|-----------|-----------|
| P  | 0.518881  | 0.545661  | 0.491174  |
| N  | 0.530581  | -1.106722 | -0.776037 |
| N  | -0.093584 | 1.412993  | -0.834206 |
| C  | -0.518716 | 0.678649  | -2.028619 |
| C  | 0.379109  | -0.546589 | -2.145547 |
| C  | 1.834118  | -1.770552 | -0.553602 |
| C  | 2.856396  | -0.663854 | -0.313128 |
| N  | 2.223255  | 0.333763  | 0.529179  |
| N  | -0.361897 | -0.433921 | 1.534733  |
| C  | -0.780994 | -1.780968 | 1.154588  |
| C  | -0.639659 | -1.923022 | -0.357420 |
| C  | 3.087780  | 1.456277  | 0.874922  |
| C  | -1.137790 | 0.145457  | 2.639116  |
| C  | -0.931085 | 2.598741  | -0.581161 |
| H  | 0.541786  | 1.657829  | 1.356642  |
| H  | -0.387257 | 1.315502  | -2.912801 |
| H  | -1.580538 | 0.406235  | -1.937035 |
| H  | -0.035310 | -1.306422 | -2.816731 |
| H  | 1.372138  | -0.264335 | -2.506287 |
| H  | 1.741142  | -2.394509 | 0.338386  |
| H  | 2.096442  | -2.410356 | -1.403924 |
| H  | 3.741198  | -1.076589 | 0.189052  |
| H  | 3.206330  | -0.229242 | -1.266162 |
| H  | -1.841657 | -1.907124 | 1.393159  |
| H  | -0.195670 | -2.531171 | 1.709324  |
| H  | -0.507700 | -2.961423 | -0.683335 |
| H  | -1.544409 | -1.489447 | -0.799505 |
| H  | 3.983657  | 1.086292  | 1.388887  |
| H  | 3.408731  | 2.024489  | -0.012420 |
| H  | 2.573689  | 2.140596  | 1.553356  |
| H  | -0.737061 | 1.123792  | 2.916212  |
| H  | -2.186843 | 0.249977  | 2.336856  |
| H  | -1.058294 | -0.506745 | 3.517449  |
| H  | -0.585065 | 3.122853  | 0.313809  |
| H  | -0.828299 | 3.285334  | -1.430006 |
| H  | -1.981520 | 2.306117  | -0.457440 |
| Cl | -3.409538 | -0.025540 | -0.203863 |

### Structure of C1b

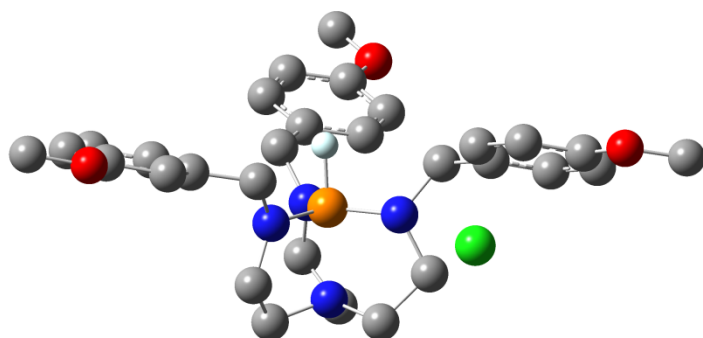

|   |           |           |           |
|---|-----------|-----------|-----------|
| P | -0.367764 | -0.084567 | 0.542573  |
| N | -0.320828 | 0.000993  | 2.603739  |
| N | 0.367695  | -1.599470 | 0.724552  |
| C | 0.710619  | -2.115162 | 2.045651  |
| C | 0.778628  | -0.925706 | 2.994829  |
| C | -0.033124 | 1.423474  | 2.926334  |
| C | 0.906925  | 1.951155  | 1.850839  |
| N | 0.482711  | 1.376542  | 0.564754  |
| N | -2.076710 | -0.016325 | 0.722906  |
| C | -2.667993 | 0.120348  | 2.045351  |
| C | -1.663674 | -0.434452 | 3.051069  |
| C | 1.458978  | 1.633061  | -0.533284 |
| C | -2.921479 | 0.464496  | -0.373829 |
| C | 0.380223  | -2.576939 | -0.369903 |
| H | -0.430996 | -0.162740 | -0.863735 |
| H | 1.693299  | -2.593977 | 2.014754  |
| H | -0.025162 | -2.873284 | 2.365012  |
| H | 0.667643  | -1.215989 | 4.045674  |
| H | 1.743430  | -0.418432 | 2.843423  |
| H | -0.983035 | 1.965170  | 2.920580  |
| H | 0.405939  | 1.498104  | 3.926699  |
| H | 0.833632  | 3.042293  | 1.801675  |
| H | 1.950111  | 1.668931  | 2.053533  |
| H | -3.605238 | -0.444413 | 2.100149  |
| H | -2.914448 | 1.173181  | 2.264286  |
| H | -1.859767 | -0.092451 | 4.073400  |
| H | -1.684214 | -1.526415 | 3.040062  |
| H | 2.414259  | 1.167066  | -0.261460 |
| H | 1.077016  | 1.146352  | -1.437543 |
| H | -2.330812 | 0.436842  | -1.296206 |
| H | -3.194804 | 1.518624  | -0.209312 |
| H | 0.065153  | -2.057007 | -1.282751 |

|   |           |           |           |
|---|-----------|-----------|-----------|
| H | -0.383467 | -3.349536 | -0.180014 |
| C | 1.659992  | 3.109951  | -0.791348 |
| C | 2.877871  | 3.714643  | -0.472479 |
| C | 0.651397  | 3.904681  | -1.359485 |
| C | 3.101487  | 5.073797  | -0.716190 |
| H | 3.662991  | 3.113774  | -0.018837 |
| C | 0.854956  | 5.255376  | -1.605597 |
| H | -0.307104 | 3.455499  | -1.611694 |
| C | 2.086870  | 5.849291  | -1.286147 |
| H | 4.060423  | 5.507936  | -0.457131 |
| H | 0.081512  | 5.874434  | -2.050165 |
| C | -4.186590 | -0.358367 | -0.562723 |
| C | -5.419239 | 0.280085  | -0.664784 |
| C | -4.125289 | -1.757193 | -0.669977 |
| C | -6.595061 | -0.455400 | -0.884151 |
| H | -5.499411 | 1.360601  | -0.581347 |
| C | -5.291250 | -2.484627 | -0.882103 |
| H | -3.168478 | -2.263621 | -0.582120 |
| C | -6.532731 | -1.848141 | -0.992892 |
| H | -5.244967 | -3.567227 | -0.967639 |
| H | -7.426305 | -2.438577 | -1.158962 |
| C | 1.719198  | -3.257131 | -0.607818 |
| C | 1.738216  | -4.563455 | -1.100124 |
| C | 2.943006  | -2.601349 | -0.397868 |
| C | 2.937433  | -5.212825 | -1.406497 |
| H | 0.801028  | -5.095710 | -1.256734 |
| C | 4.142641  | -3.242076 | -0.682095 |
| H | 2.981880  | -1.602032 | 0.033968  |
| C | 4.150200  | -4.545971 | -1.197385 |
| H | 2.911805  | -6.226757 | -1.789648 |
| H | 5.087378  | -2.741206 | -0.496405 |
| C | 3.416716  | 7.833505  | -1.281385 |
| H | 3.283941  | 8.872621  | -1.588853 |
| H | 3.650684  | 7.800100  | -0.208943 |
| H | 4.250444  | 7.392570  | -1.843699 |
| C | -8.963586 | -0.399706 | -1.195924 |
| H | -9.733497 | 0.372917  | -1.232658 |
| H | -8.950354 | -0.944284 | -2.149118 |
| H | -9.192358 | -1.101244 | -0.382791 |
| C | 5.448124  | -6.400525 | -1.960051 |
| H | 6.509753  | -6.621525 | -2.087477 |
| H | 5.009253  | -7.127623 | -1.262888 |
| H | 4.942120  | -6.487003 | -2.931572 |
| O | 2.190070  | 7.182310  | -1.569600 |

|    |           |           |           |
|----|-----------|-----------|-----------|
| O  | 5.382713  | -5.081023 | -1.450735 |
| O  | -7.739532 | 0.282038  | -0.968036 |
| Cl | 3.832372  | 0.167338  | 1.802529  |



Structure of **C1c**

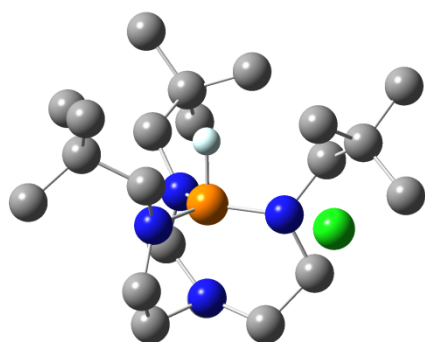

|   |           |           |           |
|---|-----------|-----------|-----------|
| P | -0.260731 | -0.032429 | 0.377768  |
| N | 0.102690  | -0.093853 | 2.419640  |
| N | 0.573461  | -1.504927 | 0.318399  |
| C | 1.046226  | -2.138020 | 1.546874  |
| C | 1.233606  | -1.046552 | 2.586578  |
| C | 0.461985  | 1.294248  | 2.807931  |
| C | 1.211077  | 1.898807  | 1.633090  |
| N | 0.505793  | 1.491209  | 0.404520  |
| N | -1.936779 | -0.083948 | 0.816894  |
| C | -2.293392 | 0.052054  | 2.224043  |
| C | -1.159928 | -0.556174 | 3.036966  |
| C | 1.162504  | 1.975427  | -0.834431 |
| C | -2.948034 | 0.420755  | -0.128117 |
| C | 0.507068  | -2.380397 | -0.866098 |
| H | -0.535130 | -0.000589 | -1.002613 |
| H | 2.014534  | -2.609995 | 1.379830  |
| H | 0.336311  | -2.919282 | 1.871260  |
| H | 1.247566  | -1.432524 | 3.612400  |
| H | 2.176724  | -0.528740 | 2.357346  |
| H | -0.464426 | 1.840772  | 3.006352  |
| H | 1.066062  | 1.281072  | 3.721321  |
| H | 1.199536  | 2.987156  | 1.724841  |
| H | 2.254442  | 1.549243  | 1.593427  |
| H | -3.224301 | -0.477526 | 2.442473  |
| H | -2.456379 | 1.109278  | 2.495642  |
| H | -1.197322 | -0.272801 | 4.095008  |
| H | -1.191372 | -1.645891 | 2.965545  |
| H | 2.242244  | 2.005469  | -0.640813 |
| H | 1.022805  | 1.227333  | -1.619596 |
| H | -2.437235 | 0.868743  | -0.986266 |
| H | -3.492599 | 1.243228  | 0.361247  |
| H | -0.265958 | -1.989210 | -1.535479 |
| H | 0.143934  | -3.362353 | -0.523459 |

|    |           |           |           |
|----|-----------|-----------|-----------|
| C  | 0.673634  | 3.335240  | -1.403493 |
| C  | -0.808335 | 3.255412  | -1.807366 |
| C  | 0.863087  | 4.498529  | -0.412075 |
| C  | 1.531587  | 3.607729  | -2.656686 |
| H  | -0.977638 | 2.464757  | -2.550083 |
| H  | -1.442840 | 3.050695  | -0.938089 |
| H  | -1.143231 | 4.201217  | -2.250441 |
| H  | 1.897547  | 4.557318  | -0.053312 |
| H  | 0.625237  | 5.453305  | -0.897095 |
| H  | 0.200363  | 4.402385  | 0.455294  |
| H  | 1.233176  | 4.549215  | -3.132909 |
| H  | 2.595366  | 3.681528  | -2.402160 |
| H  | 1.421331  | 2.807940  | -3.399355 |
| C  | -3.980374 | -0.602900 | -0.679773 |
| C  | -3.273089 | -1.686373 | -1.510667 |
| C  | -4.788051 | -1.276807 | 0.444376  |
| C  | -4.944646 | 0.189952  | -1.585205 |
| H  | -2.718804 | -1.248630 | -2.350266 |
| H  | -2.568468 | -2.257202 | -0.897329 |
| H  | -4.001934 | -2.391499 | -1.927585 |
| H  | -5.284808 | -0.537873 | 1.086096  |
| H  | -5.568286 | -1.919610 | 0.019707  |
| H  | -4.151615 | -1.911027 | 1.071391  |
| H  | -5.690920 | -0.476474 | -2.032574 |
| H  | -5.483139 | 0.961187  | -1.020288 |
| H  | -4.409090 | 0.686398  | -2.403762 |
| C  | 1.791408  | -2.596512 | -1.718409 |
| C  | 2.287853  | -1.266695 | -2.308848 |
| C  | 2.941827  | -3.242875 | -0.921919 |
| C  | 1.369762  | -3.548228 | -2.858700 |
| H  | 1.498343  | -0.765728 | -2.887121 |
| H  | 2.649411  | -0.601354 | -1.517809 |
| H  | 3.126607  | -1.448027 | -2.991722 |
| H  | 2.610997  | -4.148386 | -0.394533 |
| H  | 3.742437  | -3.542885 | -1.609213 |
| H  | 3.380539  | -2.535987 | -0.208971 |
| H  | 2.218429  | -3.742881 | -3.523777 |
| H  | 1.023235  | -4.515576 | -2.471671 |
| H  | 0.562037  | -3.120819 | -3.467629 |
| Cl | 4.005672  | 0.010704  | 0.968566  |

Structure of C2a

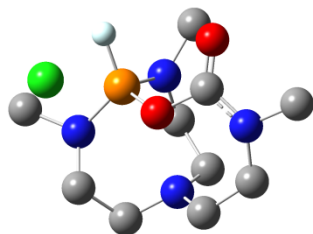

|   |           |           |           |
|---|-----------|-----------|-----------|
| P | -0.927621 | -0.530257 | 0.560664  |
| N | 0.452859  | 1.827257  | -0.595045 |
| N | -2.040073 | 0.563776  | -0.014346 |
| C | -1.819679 | 1.210637  | -1.318756 |
| C | -0.796935 | 2.344018  | -1.139305 |
| C | 0.879726  | 2.269518  | 0.716891  |
| C | -0.066379 | 1.753820  | 1.825815  |
| N | -0.247148 | 0.291657  | 1.862303  |
| N | 2.540389  | -0.702932 | -0.653014 |
| C | 2.643186  | 0.645329  | -1.234903 |
| C | 1.398314  | 1.442065  | -1.631269 |
| C | 0.328360  | -0.422367 | 3.006497  |
| C | 3.843803  | -1.291892 | -0.348375 |
| C | -3.443165 | 0.290963  | 0.353128  |
| H | -1.384155 | -1.691097 | 1.170919  |
| H | -2.780914 | 1.616002  | -1.650032 |
| H | -1.509421 | 0.472558  | -2.067929 |
| H | -0.627061 | 2.855090  | -2.100940 |
| H | -1.210783 | 3.093162  | -0.454723 |
| H | 1.883980  | 1.878608  | 0.906489  |
| H | 0.945776  | 3.370936  | 0.812136  |
| H | 0.328234  | 2.063827  | 2.799554  |
| H | -1.047744 | 2.225024  | 1.710096  |
| H | 3.231137  | 0.547959  | -2.156609 |
| H | 3.262941  | 1.246383  | -0.551831 |
| H | 1.802354  | 2.327630  | -2.161442 |
| H | 0.843251  | 0.862601  | -2.375951 |
| H | 1.423800  | -0.373677 | 3.018300  |
| H | -0.058357 | 0.002234  | 3.940920  |
| H | 0.054965  | -1.478895 | 2.964567  |
| H | 3.709733  | -2.333764 | -0.063039 |
| H | 4.479469  | -1.232425 | -1.237962 |
| H | 4.342316  | -0.761242 | 0.475075  |
| H | -3.494942 | -0.067522 | 1.386342  |
| H | -3.993224 | 1.236334  | 0.303966  |

|    |           |           |           |
|----|-----------|-----------|-----------|
| H  | -3.879759 | -0.463647 | -0.308993 |
| O  | 0.259197  | -0.817007 | -0.531654 |
| C  | 1.467999  | -1.283012 | -0.046528 |
| O  | 1.524537  | -2.160051 | 0.794751  |
| Cl | -2.248866 | -2.308150 | -1.186595 |

## Structure of C2b

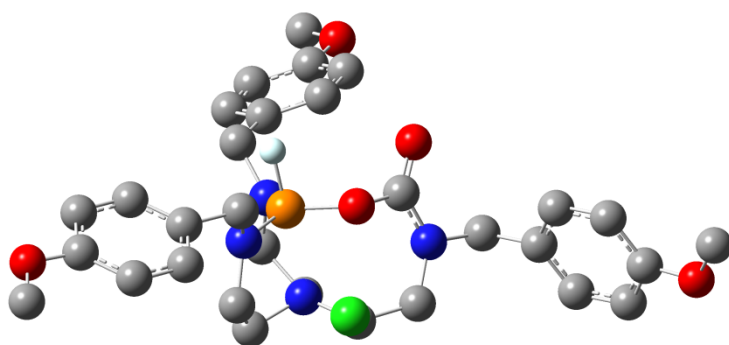

|   |           |           |           |
|---|-----------|-----------|-----------|
| P | 0.892438  | 0.643774  | -0.124629 |
| N | 0.494873  | 0.013860  | 1.883100  |
| N | 2.427733  | 0.055609  | 0.129546  |
| C | 2.810147  | -0.531838 | 1.424240  |
| C | 1.864997  | 0.035206  | 2.467324  |
| C | -0.374572 | 1.047563  | 2.483432  |
| C | 0.006412  | 2.373634  | 1.832949  |
| N | 0.283496  | 2.119965  | 0.422316  |
| N | -2.189298 | -0.832137 | 0.532610  |
| C | -1.538854 | -1.580550 | 1.621263  |
| C | -0.044373 | -1.389774 | 1.907854  |
| C | 0.397446  | 3.341328  | -0.408498 |
| C | -3.666805 | -0.868083 | 0.545834  |
| C | 3.131955  | -0.560584 | -1.048707 |
| H | 1.147868  | 1.110457  | -1.421522 |
| H | 3.838552  | -0.238987 | 1.655251  |
| H | 2.750462  | -1.629119 | 1.359073  |
| H | 1.890747  | -0.540441 | 3.399008  |
| H | 2.115941  | 1.075504  | 2.695648  |
| H | -1.409478 | 0.811405  | 2.238053  |
| H | -0.265433 | 1.076768  | 3.574324  |
| H | -0.822448 | 3.082965  | 1.914870  |
| H | 0.878673  | 2.835174  | 2.321962  |
| H | -1.666384 | -2.657670 | 1.454648  |
| H | -2.120927 | -1.334824 | 2.518509  |
| H | 0.112206  | -1.783042 | 2.921566  |
| H | 0.567793  | -2.010217 | 1.236720  |
| H | 1.213043  | 3.966043  | -0.016091 |
| H | 0.690031  | 3.034271  | -1.416403 |
| H | -3.994438 | -0.124209 | -0.181874 |
| H | -3.998326 | -0.542167 | 1.539391  |
| H | 2.818704  | -0.009748 | -1.941633 |
| H | 2.791522  | -1.599963 | -1.125915 |

|   |           |           |           |
|---|-----------|-----------|-----------|
| O | -0.215516 | -0.504739 | -0.565187 |
| C | -1.587573 | -0.326242 | -0.575837 |
| O | -2.150292 | 0.218447  | -1.506626 |
| C | -0.880151 | 4.154193  | -0.462865 |
| C | -2.056749 | 3.619820  | -1.018687 |
| C | -0.908521 | 5.465295  | 0.013877  |
| C | -3.214348 | 4.380563  | -1.089614 |
| H | -2.066637 | 2.599758  | -1.394681 |
| C | -2.066702 | 6.246816  | -0.055336 |
| H | -0.008650 | 5.900294  | 0.444671  |
| C | -3.228801 | 5.701485  | -0.610343 |
| H | -4.125087 | 3.976890  | -1.520980 |
| H | -2.047856 | 7.262654  | 0.322233  |
| C | -4.244820 | -2.233109 | 0.232020  |
| C | -4.080149 | -2.801136 | -1.036109 |
| C | -4.953330 | -2.961382 | 1.197385  |
| C | -4.594641 | -4.061664 | -1.338572 |
| H | -3.540902 | -2.252152 | -1.803736 |
| C | -5.479953 | -4.215370 | 0.910910  |
| H | -5.098858 | -2.540392 | 2.190381  |
| C | -5.298873 | -4.777337 | -0.360461 |
| H | -4.442077 | -4.472569 | -2.329722 |
| H | -6.027909 | -4.782623 | 1.656631  |
| C | 4.634322  | -0.517213 | -0.906976 |
| C | 5.332558  | -1.688807 | -0.600077 |
| C | 5.362980  | 0.669240  | -1.087246 |
| C | 6.725573  | -1.689129 | -0.479663 |
| H | 4.772324  | -2.609187 | -0.443879 |
| C | 6.745971  | 0.685285  | -0.968336 |
| H | 4.838583  | 1.592000  | -1.328352 |
| C | 7.437198  | -0.498872 | -0.664599 |
| H | 7.235735  | -2.616027 | -0.243523 |
| H | 7.318092  | 1.596698  | -1.113222 |
| O | -4.416004 | 6.360076  | -0.730656 |
| O | -5.843665 | -6.012773 | -0.545408 |
| O | 8.795420  | -0.380796 | -0.572648 |
| C | -4.488494 | 7.705273  | -0.284001 |
| H | -3.787915 | 8.349853  | -0.830920 |
| H | -5.510432 | 8.031953  | -0.483768 |
| H | -4.286568 | 7.784715  | 0.792479  |
| C | -5.651274 | -6.653206 | -1.798402 |
| H | -6.141966 | -7.624491 | -1.714888 |
| H | -6.111313 | -6.084475 | -2.617225 |
| H | -4.585635 | -6.801672 | -2.014897 |

|    |           |           |           |
|----|-----------|-----------|-----------|
| C  | 9.549940  | -1.547395 | -0.285678 |
| H  | 10.594811 | -1.231386 | -0.267798 |
| H  | 9.282951  | -1.972059 | 0.691160  |
| H  | 9.416271  | -2.315525 | -1.058706 |
| Cl | 2.004593  | -3.650467 | 0.321253  |

Structure of 1

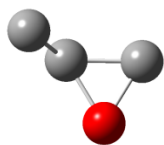

|   |           |           |           |
|---|-----------|-----------|-----------|
| C | 1.511499  | 0.100494  | -0.148695 |
| C | 0.152115  | -0.037588 | 0.489186  |
| H | 2.078324  | -0.833080 | -0.055847 |
| H | 1.416001  | 0.336765  | -1.213308 |
| H | 2.089025  | 0.896380  | 0.336954  |
| C | -1.045067 | 0.615258  | -0.060247 |
| H | 0.155684  | -0.255398 | 1.560129  |
| H | -1.875100 | 0.879958  | 0.596012  |
| H | -0.958342 | 1.222026  | -0.962775 |
| O | -0.827110 | -0.789454 | -0.242829 |



Structure of 2

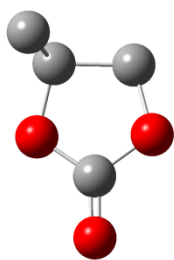

|   |           |           |           |
|---|-----------|-----------|-----------|
| O | -0.134411 | -0.861459 | 0.576176  |
| C | 1.088708  | -0.098745 | 0.498697  |
| C | 0.565077  | 1.315652  | 0.179861  |
| C | 2.004391  | -0.688272 | -0.564409 |
| H | 1.556671  | -0.145655 | 1.485648  |
| H | 1.161254  | 1.838268  | -0.571956 |
| H | 0.471622  | 1.943126  | 1.072969  |
| H | 1.544299  | -0.614684 | -1.556077 |
| H | 2.205342  | -1.742381 | -0.352623 |
| H | 2.958718  | -0.149319 | -0.583019 |
| C | -1.149978 | -0.179679 | -0.021273 |
| O | -2.243390 | -0.617329 | -0.223913 |
| O | -0.740586 | 1.075902  | -0.358787 |

### Structure of TS1-3

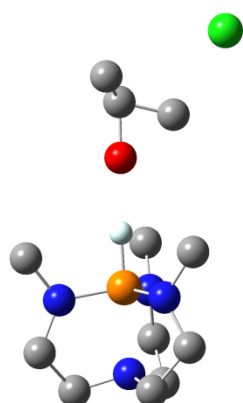

|   |           |           |           |
|---|-----------|-----------|-----------|
| C | -0.745080 | 2.727699  | -0.746112 |
| N | -1.650869 | 1.573311  | -0.658124 |
| C | -3.059366 | 1.908727  | -0.561199 |
| C | -3.861317 | 0.612901  | -0.657350 |
| N | -3.156496 | -0.401063 | 0.155056  |
| C | -3.263024 | -1.777192 | -0.375055 |
| C | -2.244002 | -1.907687 | -1.504066 |
| N | -1.023613 | -1.240480 | -1.090798 |
| C | 0.125269  | -1.435208 | -1.992188 |
| P | -1.028614 | 0.106072  | -0.060963 |
| N | -1.012837 | -0.134491 | 1.618585  |
| C | 0.286881  | -0.270660 | 2.299307  |
| C | -3.417368 | -0.296788 | 1.606614  |
| C | -2.138274 | -0.717076 | 2.326117  |
| H | 0.318893  | 0.431019  | -0.200529 |
| H | -2.158561 | -0.347844 | 3.358698  |
| H | -2.052984 | -1.815571 | 2.384838  |
| H | -4.282425 | -0.906075 | 1.896360  |
| H | -3.640651 | 0.748238  | 1.834532  |
| H | -3.873687 | 0.264825  | -1.692979 |
| H | -4.898500 | 0.736459  | -0.321950 |
| H | -3.341334 | 2.577278  | -1.384049 |
| H | -3.282152 | 2.448564  | 0.375424  |
| H | -2.041073 | -2.968400 | -1.695726 |
| H | -2.633328 | -1.485043 | -2.446334 |
| H | -4.286217 | -1.994568 | -0.705707 |
| H | -3.008137 | -2.468458 | 0.431718  |
| H | -0.956094 | 3.287104  | -1.665197 |
| H | -0.873132 | 3.404101  | 0.111435  |
| H | 0.295195  | 2.393586  | -0.773377 |
| H | 0.984071  | -0.852767 | -1.645264 |

|    |           |           |           |
|----|-----------|-----------|-----------|
| H  | 0.400326  | -2.496202 | -2.004835 |
| H  | -0.124439 | -1.126007 | -3.017287 |
| H  | 1.084041  | 0.160799  | 1.687500  |
| H  | 0.247336  | 0.260097  | 3.257842  |
| H  | 0.524701  | -1.325859 | 2.492951  |
| O  | 2.196576  | 0.631011  | -0.329777 |
| C  | 3.568329  | 0.974148  | -0.538667 |
| C  | 3.559630  | -0.385979 | -0.039866 |
| C  | 4.133574  | 2.083239  | 0.318698  |
| Cl | 5.997851  | -1.153256 | 0.115472  |
| H  | 3.835671  | 1.085092  | -1.596539 |
| H  | 3.576348  | -0.570466 | 1.021967  |
| H  | 3.475703  | -1.220539 | -0.716039 |
| H  | 3.828180  | 1.951038  | 1.362838  |
| H  | 3.783754  | 3.065584  | -0.024330 |
| H  | 5.226835  | 2.052508  | 0.273257  |

Structure of **3**

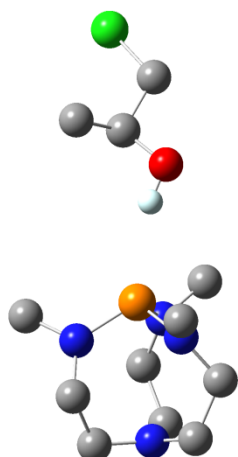

|   |           |           |           |
|---|-----------|-----------|-----------|
| C | -0.581743 | -0.864358 | 2.579533  |
| N | -1.342517 | -0.885354 | 1.339614  |
| C | -2.723982 | -1.351024 | 1.394237  |
| C | -3.815556 | -0.259708 | 1.370129  |
| N | -3.805400 | 0.609906  | 0.211385  |
| C | -3.261558 | 1.947481  | 0.334253  |
| C | -1.785431 | 2.029065  | 0.775573  |
| N | -0.812666 | 1.353739  | -0.077293 |
| C | 0.029227  | 2.174357  | -0.941345 |
| P | -0.559420 | -0.347051 | -0.097249 |
| N | -1.610752 | -0.901947 | -1.342589 |
| C | -1.387740 | -2.238435 | -1.874659 |
| C | -3.967602 | 0.033602  | -1.108082 |
| C | -2.672858 | -0.097610 | -1.936580 |
| H | 1.768724  | -0.582050 | -0.757547 |
| H | -2.919650 | -0.530082 | -2.915777 |
| H | -2.290708 | 0.912332  | -2.131129 |
| H | -4.672309 | 0.644150  | -1.700349 |
| H | -4.436274 | -0.950990 | -0.990310 |
| H | -3.732368 | 0.370353  | 2.264017  |
| H | -4.789721 | -0.775324 | 1.444038  |
| H | -2.843504 | -1.951426 | 2.306732  |
| H | -2.904862 | -2.029220 | 0.551337  |
| H | -1.496559 | 3.086417  | 0.845758  |
| H | -1.715069 | 1.621748  | 1.792103  |
| H | -3.850235 | 2.525924  | 1.068567  |
| H | -3.390566 | 2.452709  | -0.630534 |
| H | -0.881903 | -0.054244 | 3.263164  |
| H | -0.684937 | -1.816028 | 3.119760  |
| H | 0.481542  | -0.722633 | 2.352412  |

|    |           |           |           |
|----|-----------|-----------|-----------|
| H  | 0.886649  | 1.585895  | -1.287522 |
| H  | -0.500501 | 2.551878  | -1.830262 |
| H  | 0.420099  | 3.040694  | -0.389910 |
| H  | -0.416774 | -2.611850 | -1.528854 |
| H  | -2.152955 | -2.965273 | -1.558791 |
| H  | -1.367659 | -2.225316 | -2.973329 |
| O  | 2.645346  | -0.374384 | -1.148685 |
| C  | 3.595066  | -0.308100 | -0.089011 |
| C  | 4.825733  | 0.321439  | -0.743332 |
| C  | 3.863014  | -1.689464 | 0.508530  |
| Cl | 6.128931  | 0.708677  | 0.461423  |
| H  | 3.245072  | 0.372414  | 0.703490  |
| H  | 5.262190  | -0.353682 | -1.482279 |
| H  | 4.551658  | 1.259271  | -1.227288 |
| H  | 4.201907  | -2.377308 | -0.274599 |
| H  | 2.942426  | -2.096420 | 0.942465  |
| H  | 4.622911  | -1.646498 | 1.295350  |

### Structure of TS3-4

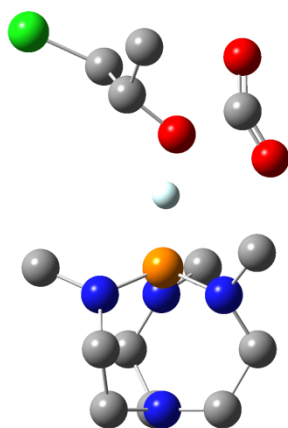

|   |           |           |           |
|---|-----------|-----------|-----------|
| C | -0.395149 | -2.656538 | -0.459880 |
| N | -1.173553 | -1.468503 | -0.803753 |
| C | -2.384554 | -1.648095 | -1.605583 |
| C | -3.691463 | -1.642256 | -0.786798 |
| N | -3.832600 | -0.455708 | 0.029430  |
| C | -3.770742 | -0.555974 | 1.470716  |
| C | -2.370917 | -0.952924 | 1.978814  |
| N | -1.294510 | -0.069218 | 1.528368  |
| C | -0.827371 | 0.954440  | 2.473113  |
| P | -0.775306 | 0.004879  | -0.076531 |
| N | -1.582785 | 1.211580  | -0.934588 |
| C | -0.787035 | 2.049163  | -1.848987 |
| C | -4.043736 | 0.829866  | -0.600139 |
| C | -2.847690 | 1.788329  | -0.464074 |
| H | 0.778509  | 0.301581  | -0.188732 |
| H | -3.041121 | 2.690014  | -1.055518 |
| H | -2.758692 | 2.116759  | 0.581328  |
| H | -4.934813 | 1.332795  | -0.186566 |
| H | -4.246140 | 0.656249  | -1.663201 |
| H | -3.722175 | -2.516739 | -0.126396 |
| H | -4.538296 | -1.748920 | -1.486831 |
| H | -2.287211 | -2.590554 | -2.158089 |
| H | -2.431386 | -0.844046 | -2.348415 |
| H | -2.356456 | -0.964472 | 3.075280  |
| H | -2.157039 | -1.977993 | 1.655172  |
| H | -4.499955 | -1.290636 | 1.854964  |
| H | -4.054077 | 0.415323  | 1.892197  |
| H | -0.904112 | -3.312547 | 0.261605  |
| H | -0.181205 | -3.240249 | -1.363117 |
| H | 0.563812  | -2.361641 | -0.021688 |

|    |           |           |           |
|----|-----------|-----------|-----------|
| H  | -0.039770 | 1.560376  | 2.016105  |
| H  | -1.640229 | 1.630366  | 2.773381  |
| H  | -0.425378 | 0.476755  | 3.375438  |
| H  | 0.185104  | 1.586561  | -2.030885 |
| H  | -1.308930 | 2.157255  | -2.807755 |
| H  | -0.597427 | 3.037937  | -1.417439 |
| O  | 2.059767  | 0.723012  | -0.405086 |
| C  | 3.070469  | -0.241435 | -0.670440 |
| C  | 3.775020  | -0.614362 | 0.643246  |
| C  | 4.025497  | 0.242693  | -1.761038 |
| Cl | 4.751755  | -2.148711 | 0.474354  |
| H  | 2.550911  | -1.144826 | -1.029969 |
| H  | 4.456776  | 0.167815  | 0.971620  |
| H  | 3.037470  | -0.809083 | 1.424045  |
| H  | 4.530506  | 1.156497  | -1.438032 |
| H  | 3.459775  | 0.461392  | -2.672915 |
| H  | 4.775869  | -0.520767 | -1.991424 |
| C  | 2.372435  | 2.243945  | 0.400489  |
| O  | 1.270142  | 2.707715  | 0.591781  |
| O  | 3.553965  | 2.409464  | 0.542923  |

Structure of 4

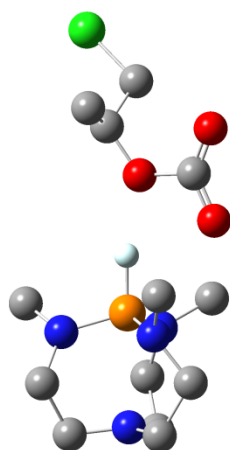

|   |           |           |           |
|---|-----------|-----------|-----------|
| C | 0.156869  | 1.994074  | 0.182267  |
| N | -1.218790 | 1.557190  | -0.107061 |
| C | -2.215312 | 2.581345  | 0.152297  |
| C | -3.576773 | 2.073687  | -0.311790 |
| N | -3.681498 | 0.663430  | 0.100611  |
| C | -4.438194 | -0.185710 | -0.836143 |
| C | -3.501734 | -0.525807 | -1.992293 |
| N | -2.194478 | -0.844374 | -1.448855 |
| C | -1.250597 | -1.425163 | -2.421789 |
| P | -1.568533 | -0.108071 | -0.052242 |
| N | -1.956895 | -0.787900 | 1.455744  |
| C | -1.095479 | -1.865653 | 1.976719  |
| C | -4.026639 | 0.467315  | 1.519953  |
| C | -3.304756 | -0.791216 | 1.994212  |
| H | -0.259732 | -0.607164 | -0.150457 |
| H | -3.263570 | -0.800389 | 3.090694  |
| H | -3.852620 | -1.701260 | 1.693119  |
| H | -5.113450 | 0.401520  | 1.662256  |
| H | -3.661001 | 1.332428  | 2.078674  |
| H | -3.630548 | 2.111416  | -1.402533 |
| H | -4.402998 | 2.672825  | 0.093243  |
| H | -1.955884 | 3.495232  | -0.396849 |
| H | -2.236044 | 2.853843  | 1.222044  |
| H | -3.892611 | -1.393054 | -2.538637 |
| H | -3.446604 | 0.303807  | -2.718703 |
| H | -5.356892 | 0.311501  | -1.174795 |
| H | -4.718335 | -1.102121 | -0.310879 |
| H | 0.435774  | 2.793329  | -0.515412 |
| H | 0.233997  | 2.386746  | 1.207001  |
| H | 0.871251  | 1.172775  | 0.080384  |



|    |           |           |           |
|----|-----------|-----------|-----------|
| H  | -0.313918 | -1.705875 | -1.929679 |
| H  | -1.701091 | -2.328418 | -2.850393 |
| H  | -1.039734 | -0.721045 | -3.240087 |
| H  | -0.145596 | -1.899109 | 1.434498  |
| H  | -0.902456 | -1.690678 | 3.042252  |
| H  | -1.588911 | -2.842104 | 1.866540  |
| O  | 2.514896  | -0.336601 | 0.398980  |
| C  | 3.844119  | 0.131836  | 0.657168  |
| C  | 4.587704  | 0.420150  | -0.655571 |
| C  | 4.613012  | -0.786812 | 1.606386  |
| Cl | 5.953637  | 1.615552  | -0.381918 |
| H  | 3.679601  | 1.096835  | 1.152492  |
| H  | 5.024911  | -0.473660 | -1.089573 |
| H  | 3.916059  | 0.891562  | -1.374397 |
| H  | 4.755752  | -1.765820 | 1.144338  |
| H  | 4.048389  | -0.912090 | 2.536836  |
| H  | 5.589493  | -0.354244 | 1.849959  |
| C  | 2.340174  | -1.565688 | -0.339389 |
| O  | 1.124480  | -1.894948 | -0.366971 |
| O  | 3.336901  | -2.096286 | -0.829624 |

Structure of TS4-2

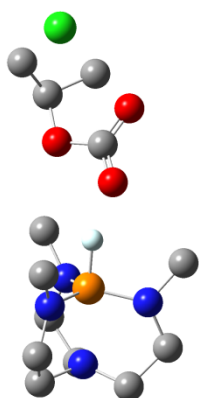

|   |           |           |           |
|---|-----------|-----------|-----------|
| C | -0.166684 | 1.977186  | -0.326834 |
| N | 1.203350  | 1.559742  | 0.011913  |
| C | 2.200115  | 2.586301  | -0.237591 |
| C | 3.546631  | 2.087357  | 0.275641  |
| N | 3.650074  | 0.660224  | -0.091330 |
| C | 4.405828  | -0.152025 | 0.884126  |
| C | 3.459572  | -0.449558 | 2.043659  |
| N | 2.157443  | -0.775166 | 1.491399  |
| C | 1.189548  | -1.307733 | 2.466358  |
| P | 1.590143  | -0.095425 | 0.043269  |
| N | 1.990140  | -0.857727 | -1.419126 |
| C | 1.145621  | -1.962582 | -1.906072 |
| C | 4.033816  | 0.426965  | -1.499083 |
| C | 3.341513  | -0.856835 | -1.948513 |
| H | 0.287402  | -0.585680 | 0.132694  |
| H | 3.310885  | -0.894037 | -3.044535 |
| H | 3.900735  | -1.749326 | -1.618622 |
| H | 5.124319  | 0.375348  | -1.607940 |
| H | 3.668829  | 1.269587  | -2.091105 |
| H | 3.576094  | 2.157951  | 1.365419  |
| H | 4.388304  | 2.662270  | -0.130106 |
| H | 1.922897  | 3.508116  | 0.288468  |
| H | 2.249767  | 2.839245  | -1.310610 |
| H | 3.839858  | -1.302359 | 2.619011  |
| H | 3.401965  | 0.401877  | 2.743379  |
| H | 5.318018  | 0.365410  | 1.206654  |
| H | 4.693566  | -1.085736 | 0.395133  |
| H | -0.486014 | 2.773486  | 0.355457  |
| H | -0.213181 | 2.360175  | -1.356152 |
| H | -0.868924 | 1.145299  | -0.246814 |
| H | 0.271088  | -1.626553 | 1.966105  |

|    |           |           |           |
|----|-----------|-----------|-----------|
| H  | 1.631617  | -2.183010 | 2.956468  |
| H  | 0.947647  | -0.562796 | 3.237925  |
| H  | 0.188729  | -1.984071 | -1.377655 |
| H  | 0.962516  | -1.832983 | -2.979472 |
| H  | 1.646137  | -2.928846 | -1.750102 |
| O  | -2.470315 | -0.501056 | -0.630639 |
| C  | -3.835103 | -0.001376 | -0.684008 |
| C  | -4.440801 | -0.099466 | 0.706031  |
| C  | -4.631374 | -0.769939 | -1.730094 |
| Cl | -5.923991 | 1.723441  | 0.393713  |
| H  | -3.742652 | 1.046797  | -0.963646 |
| H  | -5.322996 | -0.684741 | 0.898039  |
| H  | -4.026045 | 0.468066  | 1.522619  |
| H  | -4.723778 | -1.823197 | -1.442310 |
| H  | -4.132226 | -0.715690 | -2.702943 |
| H  | -5.629863 | -0.332215 | -1.814292 |
| C  | -2.307942 | -1.460903 | 0.353946  |
| O  | -1.209224 | -2.035338 | 0.401942  |
| O  | -3.318021 | -1.609026 | 1.112621  |

### Structure of TS1-5

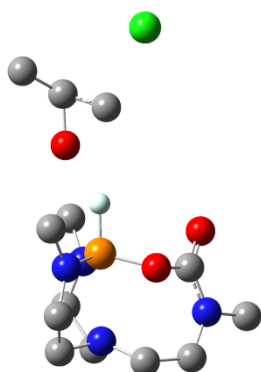

|   |           |           |           |
|---|-----------|-----------|-----------|
| P | -0.387409 | -0.448078 | -0.003089 |
| N | -2.780664 | -0.980860 | -0.176657 |
| N | -0.308215 | -1.813591 | -0.946209 |
| C | -1.455815 | -2.508946 | -1.522802 |
| C | -2.657035 | -2.386225 | -0.590359 |
| C | -3.244064 | -0.791052 | 1.201145  |
| C | -2.063251 | -1.061924 | 2.132909  |
| N | -0.837197 | -0.467857 | 1.600119  |
| N | -2.739568 | 2.180643  | -0.337237 |
| C | -3.758475 | 1.295254  | -0.910225 |
| C | -3.442415 | -0.173424 | -1.224264 |
| C | 0.214811  | -0.234236 | 2.621306  |
| C | -3.263399 | 3.462567  | 0.134958  |
| C | 1.009139  | -2.209828 | -1.500637 |
| H | 0.963677  | -0.135037 | 0.127916  |
| H | -1.194328 | -3.566272 | -1.642105 |
| H | -1.682229 | -2.122239 | -2.527438 |
| H | -3.574391 | -2.754676 | -1.072967 |
| H | -2.480724 | -2.994516 | 0.300908  |
| H | -3.549949 | 0.248681  | 1.322210  |
| H | -4.102300 | -1.430768 | 1.455455  |
| H | -2.265062 | -0.614758 | 3.111987  |
| H | -1.920333 | -2.140468 | 2.301013  |
| H | -4.123130 | 1.728169  | -1.853536 |
| H | -4.611128 | 1.334571  | -0.219711 |
| H | -4.415084 | -0.625851 | -1.480178 |
| H | -2.817081 | -0.228379 | -2.115596 |
| H | -0.052762 | 0.639801  | 3.224304  |
| H | 0.290817  | -1.114735 | 3.270008  |
| H | 1.190061  | -0.083106 | 2.149373  |
| H | -2.434083 | 4.065485  | 0.500060  |
| H | -3.767369 | 3.989847  | -0.684055 |

|    |           |           |           |
|----|-----------|-----------|-----------|
| H  | -3.984631 | 3.306372  | 0.946845  |
| H  | 1.819407  | -1.766462 | -0.912022 |
| H  | 1.094619  | -3.299872 | -1.436058 |
| H  | 1.093857  | -1.907701 | -2.551711 |
| O  | -1.002334 | 0.802879  | -0.890633 |
| C  | -1.396187 | 1.973537  | -0.234717 |
| O  | -0.602961 | 2.686752  | 0.331873  |
| C  | 4.120442  | -0.411256 | 0.900275  |
| C  | 3.713203  | 0.470659  | -0.171137 |
| O  | 2.723964  | -0.645822 | 0.654739  |
| H  | 4.312475  | 0.073007  | 1.863860  |
| H  | 3.775307  | 0.139031  | -1.195169 |
| H  | 3.341700  | 1.461234  | 0.037026  |
| C  | 5.065559  | -1.555385 | 0.621928  |
| H  | 4.824563  | -2.027487 | -0.337119 |
| H  | 5.011184  | -2.316769 | 1.410093  |
| H  | 6.085868  | -1.163544 | 0.562310  |
| Cl | 5.861015  | 1.742962  | -0.882799 |

Structure of 5

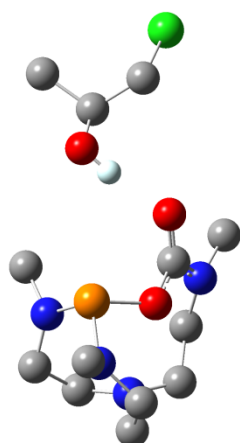

|   |           |           |           |
|---|-----------|-----------|-----------|
| P | -1.184504 | -1.353674 | -0.456235 |
| N | -3.101608 | 1.040544  | 0.592612  |
| N | -2.796096 | -1.504606 | -1.044297 |
| C | -3.641701 | -0.358044 | -1.423555 |
| C | -4.149837 | 0.483386  | -0.240020 |
| C | -2.996248 | 0.534142  | 1.940865  |
| C | -2.631671 | -0.964006 | 1.935609  |
| N | -1.395115 | -1.297501 | 1.231716  |
| N | -0.080307 | 2.307698  | -0.385650 |
| C | -1.152037 | 2.706520  | 0.549889  |
| C | -2.629916 | 2.367539  | 0.256576  |
| C | -0.183638 | -1.393474 | 2.047940  |
| C | 1.116463  | 3.144206  | -0.298914 |
| C | -2.981320 | -2.668063 | -1.922397 |
| H | 2.024462  | -1.055780 | -0.628612 |
| H | -4.520724 | -0.766654 | -1.938273 |
| H | -3.123084 | 0.290286  | -2.143470 |
| H | -4.791762 | 1.281047  | -0.650598 |
| H | -4.805264 | -0.140201 | 0.380104  |
| H | -2.219522 | 1.093557  | 2.472054  |
| H | -3.929044 | 0.660813  | 2.528683  |
| H | -2.545101 | -1.323679 | 2.969067  |
| H | -3.446024 | -1.527291 | 1.468300  |
| H | -1.104977 | 3.800166  | 0.576434  |
| H | -0.884973 | 2.374592  | 1.564949  |
| H | -3.210492 | 3.149806  | 0.787916  |
| H | -2.805389 | 2.527031  | -0.811623 |
| H | 0.081766  | -0.432044 | 2.514374  |
| H | -0.322426 | -2.130554 | 2.850037  |
| H | 0.663770  | -1.710103 | 1.430040  |

|    |           |           |           |
|----|-----------|-----------|-----------|
| H  | 1.821996  | 2.840841  | -1.070430 |
| H  | 0.835006  | 4.190817  | -0.452115 |
| H  | 1.613247  | 3.052936  | 0.678160  |
| H  | -2.290100 | -3.467088 | -1.640593 |
| H  | -4.002066 | -3.055037 | -1.815799 |
| H  | -2.812361 | -2.432195 | -2.985308 |
| O  | -1.033387 | 0.339100  | -0.928070 |
| C  | 0.115155  | 1.015805  | -0.811151 |
| O  | 1.221944  | 0.564173  | -1.108739 |
| C  | 3.687102  | -0.919025 | 0.384189  |
| C  | 4.509765  | -0.400030 | -0.801605 |
| O  | 2.608179  | -1.678629 | -0.147857 |
| H  | 3.311568  | -0.049083 | 0.944820  |
| H  | 4.980139  | -1.224652 | -1.340943 |
| H  | 3.874115  | 0.171329  | -1.479146 |
| C  | 4.474828  | -1.830097 | 1.315273  |
| H  | 4.830816  | -2.709401 | 0.766173  |
| H  | 3.831289  | -2.176946 | 2.130022  |
| H  | 5.335752  | -1.308391 | 1.742755  |
| Cl | 5.846662  | 0.732221  | -0.287234 |

### Structure of TS5-6

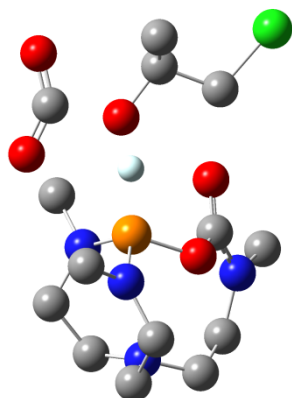

|   |           |           |           |
|---|-----------|-----------|-----------|
| P | -0.352444 | -0.606282 | -0.147114 |
| N | -3.353814 | -0.458547 | -0.410072 |
| N | -0.836767 | -1.595358 | -1.396123 |
| C | -2.002029 | -1.349466 | -2.256601 |
| C | -3.329456 | -1.435043 | -1.489334 |
| C | -3.569525 | -0.956884 | 0.933274  |
| C | -2.331644 | -1.733155 | 1.414726  |
| N | -1.093681 | -0.945843 | 1.316974  |
| N | -2.160057 | 2.570873  | 0.256454  |
| C | -3.530094 | 2.050945  | 0.084055  |
| C | -3.836234 | 0.849255  | -0.817080 |
| C | -0.285652 | -0.838223 | 2.546563  |
| C | -2.128210 | 3.792944  | 1.063621  |
| C | -0.088216 | -2.844377 | -1.627464 |
| H | 1.229232  | -0.575189 | -0.037645 |
| H | -1.978081 | -2.097615 | -3.055957 |
| H | -1.908820 | -0.367550 | -2.733017 |
| H | -4.172453 | -1.292153 | -2.187656 |
| H | -3.439941 | -2.441036 | -1.070544 |
| H | -3.726784 | -0.108108 | 1.604713  |
| H | -4.460964 | -1.606485 | 1.023689  |
| H | -2.463585 | -2.019111 | 2.463172  |
| H | -2.230209 | -2.668238 | 0.848372  |
| H | -4.115278 | 2.879673  | -0.333101 |
| H | -3.944715 | 1.875831  | 1.088218  |
| H | -4.939605 | 0.862994  | -0.927722 |
| H | -3.426783 | 1.054508  | -1.810989 |
| H | -0.902102 | -0.410135 | 3.345047  |
| H | 0.108490  | -1.812412 | 2.850406  |
| H | 0.554586  | -0.161415 | 2.381512  |
| H | -2.406021 | 3.592867  | 2.107682  |



|    |           |           |           |
|----|-----------|-----------|-----------|
| H  | -1.123309 | 4.210710  | 1.046014  |
| H  | -2.835843 | 4.514883  | 0.643809  |
| H  | 0.709231  | -2.951095 | -0.887578 |
| H  | -0.755282 | -3.711304 | -1.537414 |
| H  | 0.349572  | -2.839552 | -2.633117 |
| O  | -1.006517 | 0.839807  | -0.709535 |
| C  | -0.984454 | 1.883947  | 0.187530  |
| O  | 0.028512  | 2.180909  | 0.800191  |
| C  | 3.624665  | 0.101071  | -0.116776 |
| C  | 3.003498  | 1.370370  | -0.704255 |
| O  | 2.561174  | -0.865419 | -0.038943 |
| H  | 3.981405  | 0.303969  | 0.898391  |
| H  | 2.707171  | 1.217951  | -1.745369 |
| H  | 2.143651  | 1.702610  | -0.121713 |
| C  | 4.762498  | -0.469806 | -0.956772 |
| H  | 4.405710  | -0.713559 | -1.964856 |
| H  | 5.136771  | -1.380471 | -0.483629 |
| H  | 5.585217  | 0.247250  | -1.038951 |
| Cl | 4.179515  | 2.760934  | -0.705644 |
| C  | 2.711639  | -2.051549 | 1.079996  |
| O  | 3.755150  | -1.985067 | 1.683668  |
| O  | 1.682074  | -2.716167 | 1.021040  |

Structure of 6

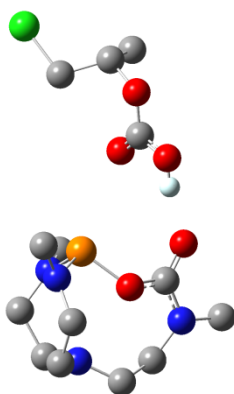

|   |           |           |           |
|---|-----------|-----------|-----------|
| P | -0.758712 | -0.839865 | -0.419064 |
| N | -3.864595 | -0.737939 | 0.499600  |
| N | -1.717641 | -2.013431 | -1.236034 |
| C | -3.110671 | -1.779511 | -1.660241 |
| C | -4.134836 | -1.739883 | -0.513332 |
| C | -3.499765 | -1.219646 | 1.811385  |
| C | -2.151603 | -1.965649 | 1.760105  |
| N | -1.037618 | -1.188883 | 1.221717  |
| N | -2.679887 | 2.439353  | 0.035112  |
| C | -3.721893 | 1.793252  | 0.858577  |
| C | -4.488329 | 0.558089  | 0.335260  |
| C | -0.237300 | -0.434279 | 2.188871  |
| C | -2.491913 | 3.860902  | 0.324649  |
| C | -0.950322 | -2.797438 | -2.214899 |
| H | 0.964556  | 1.740598  | -1.258775 |
| H | -3.386907 | -2.613025 | -2.318611 |
| H | -3.188079 | -0.861134 | -2.258564 |
| H | -5.130321 | -1.586524 | -0.962879 |
| H | -4.169063 | -2.727475 | -0.037113 |
| H | -3.418508 | -0.368264 | 2.494541  |
| H | -4.257055 | -1.900724 | 2.251455  |
| H | -1.877826 | -2.302538 | 2.768497  |
| H | -2.262886 | -2.861683 | 1.141254  |
| H | -4.480419 | 2.569251  | 1.003666  |
| H | -3.313928 | 1.586335  | 1.859465  |
| H | -5.475563 | 0.598790  | 0.839913  |
| H | -4.681507 | 0.708287  | -0.731204 |
| H | -0.820229 | 0.355435  | 2.687905  |
| H | 0.151786  | -1.107622 | 2.963831  |
| H | 0.609933  | 0.042050  | 1.684656  |
| H | -1.764388 | 4.273352  | -0.372192 |
| H | -3.448145 | 4.380906  | 0.208381  |

|    |           |           |           |
|----|-----------|-----------|-----------|
| H  | -2.122903 | 4.025475  | 1.347398  |
| H  | 0.090756  | -2.887873 | -1.893251 |
| H  | -1.367705 | -3.808999 | -2.287681 |
| H  | -0.956928 | -2.348387 | -3.220735 |
| O  | -1.861610 | 0.500510  | -0.773800 |
| C  | -1.593694 | 1.773969  | -0.475982 |
| O  | -0.515589 | 2.335106  | -0.688991 |
| C  | 4.987595  | 0.461044  | -0.451325 |
| C  | 4.669807  | -0.838368 | 0.299004  |
| O  | 3.868924  | 0.835658  | -1.294848 |
| H  | 5.762139  | 0.238218  | -1.190208 |
| H  | 4.044892  | -0.666292 | 1.171717  |
| H  | 4.186115  | -1.550814 | -0.371119 |
| C  | 5.447441  | 1.613439  | 0.435246  |
| H  | 4.681811  | 1.870286  | 1.170520  |
| H  | 5.659395  | 2.493007  | -0.180827 |
| H  | 6.365194  | 1.330880  | 0.959967  |
| Cl | 6.203404  | -1.628019 | 0.878277  |
| C  | 2.680729  | 1.123759  | -0.719243 |
| O  | 2.433705  | 1.018396  | 0.470702  |
| O  | 1.848983  | 1.522954  | -1.666307 |

## Structure of TS6-2

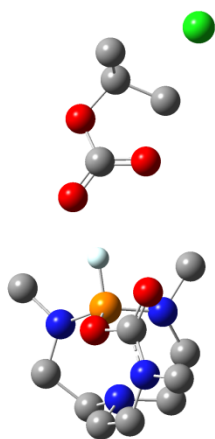

|   |           |           |           |
|---|-----------|-----------|-----------|
| P | -1.166208 | -0.543761 | -0.174477 |
| N | -3.570956 | -0.771451 | 0.679600  |
| N | -1.488975 | -2.139408 | -0.519975 |
| C | -2.793421 | -2.796160 | -0.423701 |
| C | -3.605763 | -2.235100 | 0.738301  |
| C | -3.467715 | -0.106864 | 1.976723  |
| C | -2.027480 | -0.255491 | 2.465089  |
| N | -1.070524 | 0.020497  | 1.388740  |
| N | -3.482710 | 2.128572  | -0.607181 |
| C | -4.666298 | 1.280937  | -0.422282 |
| C | -4.540779 | -0.241895 | -0.292550 |
| C | 0.246953  | 0.496635  | 1.880483  |
| C | -3.761591 | 3.559320  | -0.480240 |
| C | -0.523573 | -2.884261 | -1.365821 |
| H | 0.160694  | -0.410577 | -0.638017 |
| H | -2.622422 | -3.866853 | -0.263202 |
| H | -3.337162 | -2.702131 | -1.375672 |
| H | -4.634773 | -2.627035 | 0.715894  |
| H | -3.152107 | -2.557448 | 1.679341  |
| H | -3.678356 | 0.955080  | 1.841361  |
| H | -4.175090 | -0.499283 | 2.724515  |
| H | -1.842617 | 0.462010  | 3.270862  |
| H | -1.846215 | -1.255546 | 2.887088  |
| H | -5.359439 | 1.451741  | -1.259295 |
| H | -5.178423 | 1.671691  | 0.466943  |
| H | -5.558815 | -0.588873 | -0.042239 |
| H | -4.288685 | -0.667490 | -1.265092 |
| H | 0.111926  | 1.477524  | 2.348206  |
| H | 0.644593  | -0.204253 | 2.624344  |
| H | 0.984261  | 0.592844  | 1.080225  |

|    |           |           |           |
|----|-----------|-----------|-----------|
| H  | -2.845799 | 4.113553  | -0.676243 |
| H  | -4.533814 | 3.858696  | -1.199329 |
| H  | -4.117294 | 3.792032  | 0.531258  |
| H  | 0.425212  | -2.350831 | -1.453979 |
| H  | -0.340321 | -3.862485 | -0.907697 |
| H  | -0.942372 | -3.035529 | -2.368849 |
| O  | -2.093176 | 0.397869  | -1.168796 |
| C  | -2.201778 | 1.765384  | -0.899880 |
| O  | -1.244913 | 2.502234  | -0.947749 |
| C  | 5.165168  | -0.163209 | -0.727106 |
| C  | 4.744722  | 0.358017  | 0.638858  |
| O  | 4.026601  | -0.841584 | -1.336608 |
| H  | 5.920366  | -0.936784 | -0.600975 |
| H  | 4.762862  | 1.409075  | 0.868172  |
| H  | 4.540458  | -0.330996 | 1.441646  |
| C  | 5.659241  | 0.934077  | -1.659003 |
| H  | 4.892974  | 1.708730  | -1.779920 |
| H  | 5.890600  | 0.516864  | -2.643897 |
| H  | 6.561192  | 1.383287  | -1.235454 |
| Cl | 6.977808  | 0.378356  | 1.511851  |
| C  | 2.842066  | -0.385391 | -0.865642 |
| O  | 2.930736  | 0.440873  | 0.114558  |
| O  | 1.793577  | -0.798905 | -1.389150 |

Structure of **8**

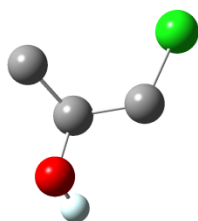

|    |           |           |           |
|----|-----------|-----------|-----------|
| H  | -2.005640 | -1.628234 | -0.447296 |
| C  | -0.880251 | -0.025699 | -0.325621 |
| C  | 0.308128  | -0.692797 | 0.378774  |
| O  | -2.054339 | -0.770726 | 0.003849  |
| H  | -0.700172 | -0.044173 | -1.411255 |
| H  | 0.214638  | -0.603361 | 1.462942  |
| H  | 0.373895  | -1.750571 | 0.111226  |
| C  | -1.124690 | 1.405963  | 0.126909  |
| H  | -1.333917 | 1.429241  | 1.202394  |
| H  | -1.990598 | 1.818163  | -0.399221 |
| H  | -0.253158 | 2.033830  | -0.077035 |
| Cl | 1.900620  | 0.046242  | -0.091348 |

### Structure of TS8-9

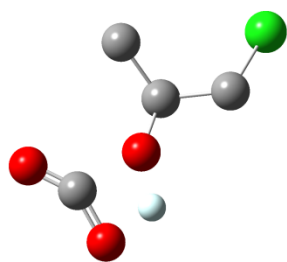

|    |           |           |           |
|----|-----------|-----------|-----------|
| H  | -1.468198 | -1.412099 | 0.259856  |
| C  | 0.261238  | 0.202914  | -0.056615 |
| C  | 1.423786  | -0.625166 | 0.494766  |
| O  | -0.918992 | -0.350335 | 0.584006  |
| H  | 0.188996  | 0.042315  | -1.140593 |
| H  | 1.561572  | -0.438684 | 1.561569  |
| H  | 1.251959  | -1.691040 | 0.332418  |
| C  | 0.345007  | 1.688434  | 0.262165  |
| H  | 0.412598  | 1.839260  | 1.344922  |
| H  | -0.544226 | 2.204997  | -0.106612 |
| H  | 1.228686  | 2.125319  | -0.211358 |
| Cl | 2.977453  | -0.215530 | -0.336669 |
| C  | -2.398760 | -0.113567 | -0.122028 |
| O  | -2.823994 | 0.963871  | -0.354559 |
| O  | -2.636480 | -1.353754 | -0.202767 |

Structure of **9**

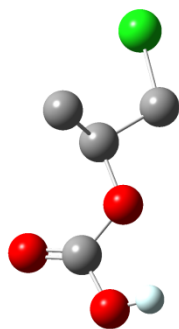

|    |           |           |           |
|----|-----------|-----------|-----------|
| H  | -2.833807 | -1.362612 | 0.953714  |
| C  | 0.250265  | 0.245641  | 0.016200  |
| C  | 1.342998  | -0.788832 | 0.283302  |
| O  | -0.970626 | -0.441503 | 0.419357  |
| H  | 0.180104  | 0.449026  | -1.055023 |
| H  | 1.458407  | -0.977596 | 1.352720  |
| H  | 1.113552  | -1.724915 | -0.227653 |
| C  | 0.391496  | 1.542310  | 0.798975  |
| H  | 0.395413  | 1.344499  | 1.876751  |
| H  | -0.440717 | 2.210567  | 0.561950  |
| H  | 1.325081  | 2.045710  | 0.532267  |
| Cl | 2.945356  | -0.223584 | -0.337417 |
| C  | -2.106640 | -0.074566 | -0.229434 |
| O  | -2.194078 | 0.743093  | -1.106461 |
| O  | -3.152521 | -0.767973 | 0.252992  |



Structure of **10**

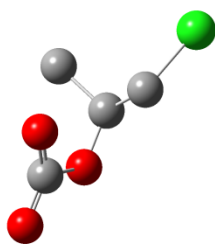

|    |           |           |           |
|----|-----------|-----------|-----------|
| C  | 0.207618  | 0.589723  | -0.513616 |
| C  | 0.953367  | -0.652762 | -0.001955 |
| O  | -1.100249 | 0.241709  | -0.920141 |
| H  | 0.711219  | 0.901299  | -1.441080 |
| H  | 0.685575  | -0.902549 | 1.019233  |
| H  | 0.764917  | -1.498272 | -0.663952 |
| C  | 0.241653  | 1.761383  | 0.474674  |
| H  | -0.287621 | 1.475185  | 1.386015  |
| H  | -0.264152 | 2.625580  | 0.028103  |
| H  | 1.272820  | 2.047673  | 0.716751  |
| Cl | 2.798594  | -0.412882 | -0.032382 |
| C  | -2.045401 | -0.307962 | 0.088699  |
| O  | -1.555138 | -0.541001 | 1.213625  |
| O  | -3.169897 | -0.447235 | -0.391159 |

### Structure of TS10-11

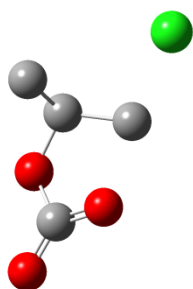

|    |           |           |           |
|----|-----------|-----------|-----------|
| C  | 0.140641  | 0.667030  | -0.362958 |
| C  | 0.681780  | -0.610559 | 0.266056  |
| O  | -1.181272 | 0.471892  | -0.862622 |
| H  | 0.743756  | 0.899373  | -1.244051 |
| H  | 0.877935  | -0.673446 | 1.322289  |
| H  | 0.577728  | -1.538644 | -0.272579 |
| C  | 0.189342  | 1.840408  | 0.617153  |
| H  | -0.414000 | 1.606365  | 1.500671  |
| H  | -0.218272 | 2.739970  | 0.143260  |
| H  | 1.221817  | 2.035978  | 0.927004  |
| Cl | 2.839860  | -0.428500 | -0.184436 |
| C  | -1.978387 | -0.357299 | -0.028414 |
| O  | -1.306232 | -0.931964 | 0.891892  |
| O  | -3.170850 | -0.417750 | -0.303295 |

Structure of **11**

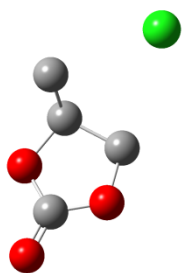

|    |           |           |           |
|----|-----------|-----------|-----------|
| C  | 0.048245  | 0.578663  | -0.298558 |
| C  | 0.061208  | -0.828901 | 0.311659  |
| O  | -1.350805 | 0.722736  | -0.713192 |
| H  | 0.670223  | 0.620581  | -1.190895 |
| H  | 0.613439  | -0.887848 | 1.247273  |
| H  | 0.451294  | -1.580943 | -0.375063 |
| C  | 0.423120  | 1.690166  | 0.664661  |
| H  | -0.162581 | 1.623670  | 1.590911  |
| H  | 0.244703  | 2.671386  | 0.210394  |
| H  | 1.488959  | 1.575565  | 0.886975  |
| Cl | 3.191982  | -0.366490 | -0.189433 |
| C  | -2.110602 | -0.217316 | -0.112287 |
| O  | -1.347412 | -1.096932 | 0.572482  |
| O  | -3.314478 | -0.266773 | -0.177051 |

Structure of **12**

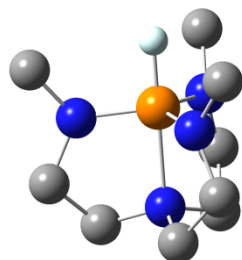

|   |           |           |           |
|---|-----------|-----------|-----------|
| P | -0.004189 | 0.000301  | -0.714548 |
| N | 0.008569  | -0.000768 | 1.379108  |
| N | -0.849408 | -1.462928 | -0.564727 |
| C | -1.293865 | -1.935495 | 0.739636  |
| C | -0.315666 | -1.396497 | 1.777374  |
| C | 1.382876  | 0.413656  | 1.768400  |
| C | 2.329877  | -0.156555 | 0.718386  |
| N | 1.686759  | -0.000421 | -0.579355 |
| N | -0.847949 | 1.464196  | -0.563275 |
| C | -1.021750 | 2.091611  | 0.739902  |
| C | -1.034127 | 0.979861  | 1.783042  |
| C | 2.534904  | -0.358972 | -1.721871 |
| C | -0.972556 | 2.384376  | -1.699469 |
| C | -1.595177 | -2.022939 | -1.697594 |
| H | -0.012578 | 0.000810  | -2.120668 |
| H | -1.288758 | -3.031194 | 0.761305  |
| H | -2.326917 | -1.615651 | 0.950115  |
| H | -0.718896 | -1.421310 | 2.795031  |
| H | 0.609633  | -1.976146 | 1.755537  |
| H | 1.422168  | 1.504936  | 1.754364  |
| H | 1.614808  | 0.069463  | 2.781593  |
| H | 3.275927  | 0.396410  | 0.735038  |
| H | 2.572213  | -1.212216 | 0.919963  |
| H | -1.972770 | 2.635479  | 0.768473  |
| H | -0.225927 | 2.827021  | 0.938930  |
| H | -0.844025 | 1.346201  | 2.797190  |
| H | -1.998991 | 0.468446  | 1.772960  |
| H | 3.431373  | 0.270227  | -1.720668 |
| H | 2.845122  | -1.411940 | -1.681505 |
| H | 2.007659  | -0.187933 | -2.662320 |
| H | -0.865628 | 1.847523  | -2.643961 |
| H | -1.965846 | 2.845644  | -1.686370 |
| H | -0.215798 | 3.179671  | -1.661739 |
| H | -1.191326 | -1.657418 | -2.643638 |

|   |           |           |           |
|---|-----------|-----------|-----------|
| H | -1.500102 | -3.114028 | -1.691537 |
| H | -2.661404 | -1.763322 | -1.648961 |

## Structure of TS12-13

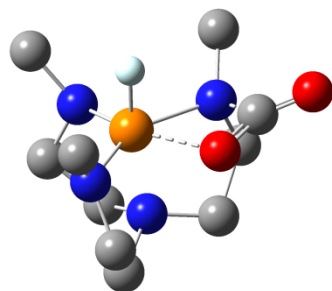

|   |           |           |           |
|---|-----------|-----------|-----------|
| P | -0.230223 | 0.044114  | -0.614086 |
| N | -0.567948 | -0.090145 | 1.431720  |
| N | -1.339171 | 1.357033  | -0.582932 |
| C | -1.343613 | 2.118929  | 0.666245  |
| C | -1.399652 | 1.106883  | 1.805373  |
| C | -1.334493 | -1.371026 | 1.621571  |
| C | -2.071686 | -1.651556 | 0.321998  |
| N | -1.105982 | -1.424320 | -0.750807 |
| N | 1.538258  | -0.634623 | -0.159978 |
| C | 1.666165  | -1.045526 | 1.261615  |
| C | 0.761685  | -0.143579 | 2.101233  |
| C | -1.621910 | -1.788271 | -2.081301 |
| C | 2.091140  | -1.653998 | -1.083790 |
| C | -1.328348 | 2.229369  | -1.771767 |
| H | 0.169246  | 0.117906  | -1.960624 |
| H | -2.237907 | 2.749225  | 0.702201  |
| H | -0.462667 | 2.770243  | 0.735522  |
| H | -1.044261 | 1.518652  | 2.753678  |
| H | -2.425502 | 0.760958  | 1.940528  |
| H | -0.625272 | -2.173981 | 1.822743  |
| H | -1.998596 | -1.273888 | 2.484630  |
| H | -2.411127 | -2.692273 | 0.303359  |
| H | -2.959106 | -1.007263 | 0.214532  |
| H | 2.713687  | -0.938166 | 1.559594  |
| H | 1.392850  | -2.100377 | 1.347921  |
| H | 0.654647  | -0.530213 | 3.119637  |
| H | 1.158251  | 0.871600  | 2.152220  |
| H | -1.877988 | -2.852159 | -2.079944 |
| H | -2.518420 | -1.213280 | -2.354288 |
| H | -0.856709 | -1.633686 | -2.845302 |
| H | 1.949742  | -1.324678 | -2.115200 |
| H | 3.164604  | -1.731925 | -0.890596 |
| H | 1.592106  | -2.611584 | -0.924441 |

|   |           |          |           |
|---|-----------|----------|-----------|
| H | -1.362867 | 1.631498 | -2.684914 |
| H | -2.232522 | 2.844996 | -1.748986 |
| H | -0.447123 | 2.882709 | -1.795759 |
| O | 1.313170  | 1.605677 | -0.320632 |
| C | 2.274019  | 0.788184 | -0.308550 |
| O | 3.472122  | 0.804560 | -0.340243 |

Structure of **13**

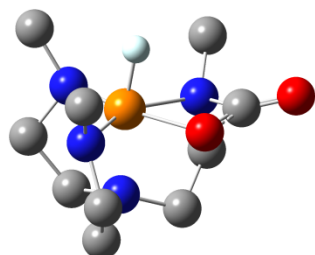

|   |           |           |           |
|---|-----------|-----------|-----------|
| P | 0.247120  | -0.012474 | -0.606715 |
| N | 0.434221  | -0.045948 | 1.441923  |
| N | 1.635519  | -1.035284 | -0.634564 |
| C | 1.662325  | -1.983549 | 0.478295  |
| C | 1.376733  | -1.187799 | 1.754798  |
| C | 1.038516  | 1.283973  | 1.819956  |
| C | 1.769484  | 1.818392  | 0.599616  |
| N | 0.863753  | 1.604321  | -0.521845 |
| N | -1.703907 | 0.475923  | -0.179597 |
| C | -1.904264 | 0.694089  | 1.277286  |
| C | -0.923041 | -0.194608 | 2.047000  |
| C | 1.342628  | 2.203936  | -1.775990 |
| C | -2.409626 | 1.475595  | -1.012044 |
| C | 1.949024  | -1.662740 | -1.929395 |
| H | -0.075552 | 0.059832  | -1.974489 |
| H | 2.660688  | -2.427291 | 0.552711  |
| H | 0.939886  | -2.799096 | 0.339748  |
| H | 0.943213  | -1.807781 | 2.543015  |
| H | 2.301159  | -0.748975 | 2.131400  |
| H | 0.230147  | 1.964918  | 2.086262  |
| H | 1.681443  | 1.154976  | 2.693943  |
| H | 1.967127  | 2.888003  | 0.726954  |
| H | 2.735106  | 1.308803  | 0.452950  |
| H | -2.936779 | 0.445482  | 1.545064  |
| H | -1.744886 | 1.756000  | 1.477410  |
| H | -0.889939 | 0.091858  | 3.102870  |
| H | -1.211878 | -1.244719 | 1.986920  |
| H | 1.428898  | 3.286673  | -1.639465 |
| H | 2.324337  | 1.814139  | -2.083920 |
| H | 0.626799  | 2.030813  | -2.583480 |
| H | -2.210576 | 1.269655  | -2.065660 |
| H | -3.486495 | 1.400274  | -0.835533 |
| H | -2.042801 | 2.470802  | -0.755191 |
| H | 1.955658  | -0.912177 | -2.723201 |



|   |           |           |           |
|---|-----------|-----------|-----------|
| H | 2.954907  | -2.090076 | -1.873497 |
| H | 1.240612  | -2.460342 | -2.194756 |
| O | -0.902587 | -1.544799 | -0.503780 |
| C | -2.067278 | -0.958994 | -0.492121 |
| O | -3.186411 | -1.353640 | -0.640615 |

## Structure of TS13-14

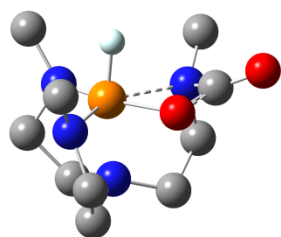

|   |           |           |           |
|---|-----------|-----------|-----------|
| P | 0.321101  | -0.060881 | -0.630836 |
| N | 0.474633  | 0.084937  | 1.410414  |
| N | 1.762219  | -0.986391 | -0.584369 |
| C | 1.842045  | -1.831977 | 0.606610  |
| C | 1.532455  | -0.928156 | 1.801452  |
| C | 0.933411  | 1.488821  | 1.700753  |
| C | 1.627405  | 2.006641  | 0.448876  |
| N | 0.779395  | 1.588771  | -0.654189 |
| N | -1.867126 | 0.354298  | -0.152167 |
| C | -1.968934 | 0.571552  | 1.311122  |
| C | -0.854364 | -0.177084 | 2.049869  |
| C | 1.033283  | 2.249197  | -1.938531 |
| C | -2.787742 | 1.209298  | -0.925275 |
| C | 2.152101  | -1.669548 | -1.828879 |
| H | -0.038736 | -0.075208 | -1.989976 |
| H | 2.860987  | -2.219606 | 0.709137  |
| H | 1.157480  | -2.689527 | 0.554466  |
| H | 1.190427  | -1.487386 | 2.675682  |
| H | 2.427352  | -0.368661 | 2.075604  |
| H | 0.056061  | 2.101262  | 1.906698  |
| H | 1.571481  | 1.488372  | 2.587811  |
| H | 1.691709  | 3.098941  | 0.487152  |
| H | 2.650089  | 1.608428  | 0.358068  |
| H | -2.941978 | 0.227083  | 1.684465  |
| H | -1.914006 | 1.649949  | 1.479951  |
| H | -0.814865 | 0.147691  | 3.094893  |
| H | -1.027042 | -1.253477 | 2.036877  |
| H | 0.889405  | 3.328467  | -1.823421 |
| H | 2.053455  | 2.069975  | -2.306914 |
| H | 0.324996  | 1.900489  | -2.694618 |
| H | -2.653988 | 1.008335  | -1.990098 |
| H | -3.829239 | 1.002309  | -0.656961 |
| H | -2.547391 | 2.255074  | -0.721383 |
| H | 2.118538  | -0.971079 | -2.668596 |

|   |           |           |           |
|---|-----------|-----------|-----------|
| H | 3.185802  | -2.013716 | -1.728196 |
| H | 1.511643  | -2.533575 | -2.055523 |
| O | -0.739179 | -1.531181 | -0.386979 |
| C | -1.987545 | -1.081671 | -0.439752 |
| O | -3.000225 | -1.678154 | -0.664004 |

Structure of **14**

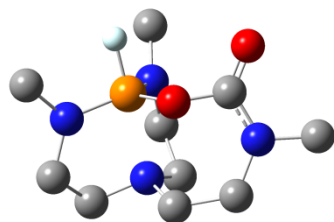

|   |           |           |           |
|---|-----------|-----------|-----------|
| P | 0.826829  | 0.678789  | -0.431925 |
| N | 0.364768  | -1.108027 | 0.753682  |
| N | 2.213293  | -0.162055 | -0.824794 |
| C | 2.496623  | -1.505976 | -0.328881 |
| C | 1.714632  | -1.695085 | 0.963471  |
| C | -0.231237 | -0.610214 | 2.016533  |
| C | 0.380461  | 0.761666  | 2.284628  |
| N | 0.507780  | 1.462103  | 1.007664  |
| N | -2.469094 | -0.399777 | -0.430229 |
| C | -2.001311 | -1.755055 | -0.120166 |
| C | -0.498081 | -2.060324 | -0.019926 |
| C | 0.647237  | 2.925529  | 1.120700  |
| C | -3.904630 | -0.188691 | -0.211098 |
| C | 3.103486  | 0.294610  | -1.905542 |
| H | 1.156681  | 1.833619  | -1.147225 |
| H | 3.569810  | -1.599826 | -0.129215 |
| H | 2.239106  | -2.263711 | -1.082098 |
| H | 1.645718  | -2.747779 | 1.258596  |
| H | 2.201477  | -1.143483 | 1.771454  |
| H | -1.304183 | -0.496564 | 1.869252  |
| H | -0.060477 | -1.309266 | 2.843096  |
| H | -0.279143 | 1.333838  | 2.944694  |
| H | 1.356051  | 0.691086  | 2.787041  |
| H | -2.395548 | -2.461926 | -0.864565 |
| H | -2.481844 | -2.025072 | 0.827630  |
| H | -0.429699 | -3.046400 | 0.458748  |
| H | -0.064077 | -2.145285 | -1.014816 |
| H | -0.238244 | 3.333076  | 1.618020  |
| H | 1.539577  | 3.188665  | 1.700764  |
| H | 0.717237  | 3.385647  | 0.134595  |
| H | -4.151974 | 0.835403  | -0.484231 |
| H | -4.488649 | -0.881512 | -0.827772 |
| H | -4.154279 | -0.357234 | 0.842430  |
| H | 2.831061  | 1.297880  | -2.236351 |

|   |           |           |           |
|---|-----------|-----------|-----------|
| H | 4.137301  | 0.318702  | -1.545248 |
| H | 3.040203  | -0.381471 | -2.766151 |
| O | -0.455666 | 0.188601  | -1.339730 |
| C | -1.762694 | 0.603266  | -1.014970 |
| O | -2.140920 | 1.723363  | -1.251837 |

Structure of **15**

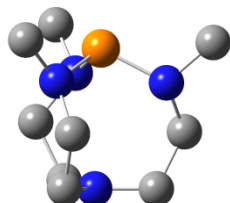

|   |           |           |           |
|---|-----------|-----------|-----------|
| P | 1.333966  | 0.007272  | -0.008979 |
| N | -2.001051 | -0.009801 | 0.012951  |
| N | 0.582345  | 1.574851  | -0.137228 |
| C | -0.565881 | 1.965873  | 0.681085  |
| C | -1.913082 | 1.425212  | 0.169547  |
| C | -1.912477 | -0.590548 | -1.308583 |
| C | -0.571568 | -0.399870 | -2.039891 |
| N | 0.587543  | -0.897295 | -1.298374 |
| N | 0.604812  | -0.667165 | 1.423731  |
| C | -0.542826 | -1.573273 | 1.369612  |
| C | -1.894369 | -0.862607 | 1.176109  |
| C | 1.520741  | -1.692739 | -2.096384 |
| C | 1.550109  | -0.953115 | 2.503243  |
| C | 1.511027  | 2.665324  | -0.435829 |
| H | -0.621505 | 3.062296  | 0.690218  |
| H | -0.425359 | 1.643534  | 1.723742  |
| H | -2.693507 | 1.775992  | 0.868402  |
| H | -2.134896 | 1.879203  | -0.803946 |
| H | -2.119426 | -1.663488 | -1.213785 |
| H | -2.702130 | -0.171252 | -1.957537 |
| H | -0.625014 | -0.940762 | -2.993773 |
| H | -0.446636 | 0.666088  | -2.282548 |
| H | -0.584183 | -2.129210 | 2.315421  |
| H | -0.412413 | -2.315186 | 0.567479  |
| H | -2.673687 | -1.644902 | 1.141767  |
| H | -2.104876 | -0.246909 | 2.059071  |
| H | 1.043325  | -2.623524 | -2.430539 |
| H | 1.887601  | -1.160196 | -2.990406 |
| H | 2.390681  | -1.964096 | -1.491006 |
| H | 2.410803  | -0.281555 | 2.431985  |
| H | 1.077644  | -0.787634 | 3.480641  |
| H | 1.930381  | -1.988688 | 2.481653  |
| H | 2.373762  | 2.279189  | -0.986716 |
| H | 1.024372  | 3.422005  | -1.065523 |

|   |          |          |          |
|---|----------|----------|----------|
| H | 1.889975 | 3.170322 | 0.469075 |
|---|----------|----------|----------|

## Structure of TS15-16

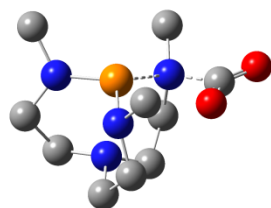

|   |           |           |           |
|---|-----------|-----------|-----------|
| P | 0.398250  | -0.175487 | -1.195159 |
| N | 0.621193  | 0.369005  | 1.526094  |
| N | 1.641874  | -1.232992 | -0.541960 |
| C | 1.532091  | -1.807178 | 0.809746  |
| C | 1.517378  | -0.728121 | 1.891276  |
| C | 1.276236  | 1.659224  | 1.399561  |
| C | 2.066315  | 1.681090  | 0.074200  |
| N | 1.198304  | 1.334360  | -1.039564 |
| N | -1.724515 | 0.387808  | -0.193823 |
| C | -1.761982 | 0.978459  | 1.149576  |
| C | -0.722343 | 0.350590  | 2.088247  |
| C | 0.566576  | 2.463644  | -1.716207 |
| C | -2.655832 | 1.069810  | -1.103497 |
| C | 1.851753  | -2.325873 | -1.515136 |
| H | 2.406440  | -2.452097 | 0.970227  |
| H | 0.634729  | -2.435367 | 0.879829  |
| H | 1.229304  | -1.174258 | 2.854141  |
| H | 2.527417  | -0.324047 | 2.021972  |
| H | 0.518155  | 2.448064  | 1.388092  |
| H | 1.954459  | 1.871424  | 2.243963  |
| H | 2.511557  | 2.668281  | -0.095546 |
| H | 2.875660  | 0.945661  | 0.117784  |
| H | -2.758908 | 0.832511  | 1.592096  |
| H | -1.599611 | 2.059266  | 1.053550  |
| H | -0.778144 | 0.865610  | 3.063775  |
| H | -0.995681 | -0.693852 | 2.263996  |
| H | -0.041603 | 3.083227  | -1.040264 |
| H | 1.335261  | 3.103583  | -2.166615 |
| H | -0.080558 | 2.095295  | -2.517672 |
| H | -2.514376 | 0.682000  | -2.117281 |
| H | -3.693667 | 0.883752  | -0.798640 |
| H | -2.460802 | 2.147090  | -1.104410 |
| H | 1.908793  | -1.926498 | -2.531623 |
| H | 2.811780  | -2.808337 | -1.295522 |



|   |           |           |           |
|---|-----------|-----------|-----------|
| H | 1.055401  | -3.083244 | -1.476797 |
| O | -1.087321 | -1.810238 | -0.422839 |
| C | -2.086618 | -1.104946 | -0.110409 |
| O | -3.222527 | -1.387662 | 0.243208  |

Structure of **16**

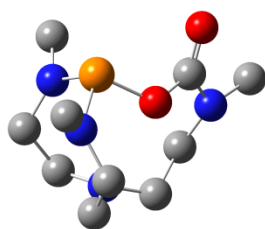

|   |           |           |           |
|---|-----------|-----------|-----------|
| P | -0.920267 | -1.390645 | 0.035987  |
| N | -0.311304 | 1.799710  | 0.054722  |
| N | -2.130609 | -0.485816 | -0.795421 |
| C | -1.832133 | 0.699277  | -1.619676 |
| C | -1.457288 | 1.958912  | -0.818170 |
| C | -0.557977 | 1.842743  | 1.476270  |
| C | -1.442408 | 0.658319  | 1.916548  |
| N | -0.922040 | -0.665954 | 1.587821  |
| N | 2.555788  | 0.040504  | -0.579927 |
| C | 2.211385  | 1.344175  | 0.018749  |
| C | 0.988302  | 2.142866  | -0.484198 |
| C | -0.092382 | -1.310285 | 2.601296  |
| C | 3.969473  | -0.305241 | -0.446244 |
| C | -3.200927 | -1.321009 | -1.353640 |
| H | -2.741784 | 0.930673  | -2.188868 |
| H | -1.043638 | 0.479318  | -2.352350 |
| H | -1.289295 | 2.774632  | -1.541847 |
| H | -2.323132 | 2.263796  | -0.217155 |
| H | 0.399506  | 1.798291  | 2.005034  |
| H | -1.051172 | 2.781640  | 1.804535  |
| H | -1.603102 | 0.705079  | 3.002243  |
| H | -2.425132 | 0.755336  | 1.443839  |
| H | 3.078134  | 1.982110  | -0.185026 |
| H | 2.169937  | 1.246104  | 1.115396  |
| H | 1.237622  | 3.206207  | -0.287190 |
| H | 0.942182  | 2.033441  | -1.571881 |
| H | 0.860218  | -0.785388 | 2.775374  |
| H | -0.628244 | -1.364829 | 3.558519  |
| H | 0.148229  | -2.330426 | 2.283460  |
| H | 4.151033  | -1.254252 | -0.948518 |
| H | 4.578580  | 0.478582  | -0.908679 |
| H | 4.273925  | -0.411165 | 0.606387  |
| H | -3.340468 | -2.214426 | -0.738681 |
| H | -4.146350 | -0.764383 | -1.354912 |
| H | -2.995008 | -1.648928 | -2.385491 |
| O | 0.410639  | -0.629933 | -0.789369 |

|   |          |           |           |
|---|----------|-----------|-----------|
| C | 1.686799 | -1.037021 | -0.599670 |
| O | 2.035868 | -2.202222 | -0.519623 |

Structure of 17

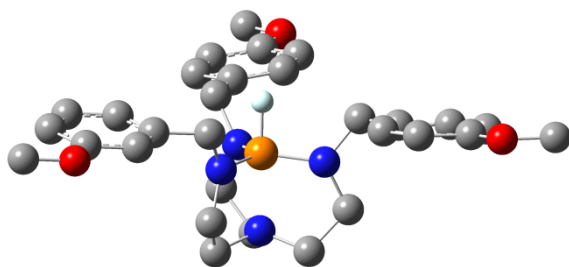

|   |           |           |           |
|---|-----------|-----------|-----------|
| P | 0.098577  | -0.107615 | 0.451551  |
| N | 0.099603  | -0.143132 | 2.551343  |
| N | 1.603874  | -0.878723 | 0.585247  |
| C | 2.081204  | -1.351856 | 1.878030  |
| C | 1.506468  | -0.425064 | 2.940914  |
| C | -0.364658 | 1.205921  | 2.970295  |
| C | 0.163792  | 2.193958  | 1.939002  |
| N | 0.008987  | 1.577361  | 0.627890  |
| N | -1.319652 | -1.031755 | 0.585054  |
| C | -1.949034 | -1.237467 | 1.883633  |
| C | -0.842065 | -1.229940 | 2.929196  |
| C | 0.231697  | 2.490848  | -0.517111 |
| C | -2.212574 | -1.244976 | -0.573231 |
| C | 2.261640  | -1.504648 | -0.585350 |
| H | 0.097043  | -0.084239 | -0.954664 |
| H | 3.174616  | -1.315461 | 1.901582  |
| H | 1.786878  | -2.399574 | 2.052064  |
| H | 1.545907  | -0.854307 | 3.947728  |
| H | 2.051459  | 0.521353  | 2.943397  |
| H | -1.456721 | 1.205151  | 2.959579  |
| H | -0.024867 | 1.428325  | 3.987424  |
| H | -0.414840 | 3.121839  | 1.979046  |
| H | 1.216011  | 2.458204  | 2.132972  |
| H | -2.466176 | -2.201633 | 1.893879  |
| H | -2.704633 | -0.461575 | 2.086831  |
| H | -1.217307 | -1.074701 | 3.946313  |
| H | -0.295610 | -2.175053 | 2.899001  |
| H | 1.240046  | 2.924124  | -0.444301 |
| H | 0.211440  | 1.890761  | -1.432504 |
| H | -1.669926 | -0.955168 | -1.478568 |
| H | -3.082142 | -0.576571 | -0.494065 |
| H | 1.737048  | -1.166034 | -1.484527 |
| H | 2.130993  | -2.595575 | -0.534310 |
| C | -0.793169 | 3.602522  | -0.596477 |
| C | -0.409447 | 4.940447  | -0.492623 |

|   |           |           |           |
|---|-----------|-----------|-----------|
| C | -2.154511 | 3.317982  | -0.800991 |
| C | -1.339196 | 5.979979  | -0.592121 |
| H | 0.638812  | 5.189399  | -0.340188 |
| C | -3.091893 | 4.333688  | -0.897651 |
| H | -2.481984 | 2.284218  | -0.888955 |
| C | -2.690928 | 5.678645  | -0.795609 |
| H | -1.001187 | 7.006326  | -0.511177 |
| H | -4.143331 | 4.120565  | -1.062160 |
| C | -2.684925 | -2.682277 | -0.696085 |
| C | -4.046750 | -2.967570 | -0.660685 |
| C | -1.762654 | -3.727392 | -0.867200 |
| C | -4.509401 | -4.287364 | -0.804209 |
| H | -4.784193 | -2.179733 | -0.533034 |
| C | -2.221281 | -5.033064 | -1.005188 |
| H | -0.697163 | -3.515177 | -0.897198 |
| C | -3.588784 | -5.327054 | -0.976096 |
| H | -1.511733 | -5.844083 | -1.144942 |
| H | -3.918913 | -6.352900 | -1.089405 |
| C | 3.736053  | -1.174422 | -0.683317 |
| C | 4.702194  | -2.179652 | -0.619514 |
| C | 4.169731  | 0.150232  | -0.865605 |
| C | 6.066021  | -1.894766 | -0.736991 |
| H | 4.393999  | -3.214529 | -0.484949 |
| C | 5.516839  | 0.453592  | -0.979580 |
| H | 3.438461  | 0.953774  | -0.922202 |
| C | 6.480381  | -0.570038 | -0.917955 |
| H | 6.785274  | -2.703704 | -0.687203 |
| H | 5.857496  | 1.473483  | -1.127223 |
| C | -3.347859 | 7.977451  | -0.841639 |
| H | -4.287358 | 8.516897  | -0.966878 |
| H | -2.905900 | 8.236307  | 0.128761  |
| H | -2.656131 | 8.258037  | -1.645536 |
| C | -6.400877 | -5.746345 | -0.916540 |
| H | -7.483221 | -5.626758 | -0.855410 |
| H | -6.135617 | -6.171610 | -1.892339 |
| H | -6.063425 | -6.420983 | -0.119674 |
| C | 8.797078  | -1.153957 | -1.018896 |
| H | 9.732959  | -0.609263 | -1.148452 |
| H | 8.816341  | -1.688192 | -0.060652 |
| H | 8.678085  | -1.874547 | -1.837472 |
| O | -3.684041 | 6.595417  | -0.906629 |
| O | 7.769695  | -0.168474 | -1.043037 |
| O | -5.857826 | -4.439931 | -0.755712 |

## Structures of **18**

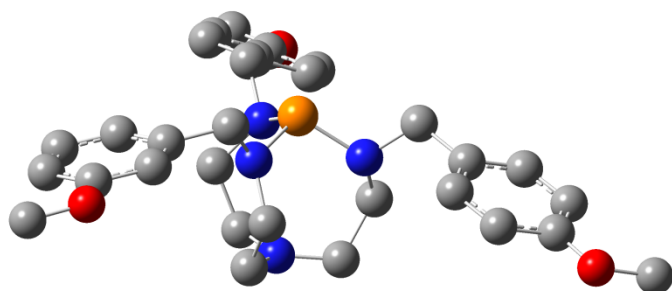

|   |           |           |           |
|---|-----------|-----------|-----------|
| P | 0.069257  | -0.105157 | -0.933930 |
| N | 0.105955  | -0.046127 | 2.351877  |
| N | 1.519459  | -0.778552 | -0.227920 |
| C | 1.505241  | -1.622104 | 0.972412  |
| C | 1.304491  | -0.849374 | 2.283715  |
| C | 0.200273  | 1.392118  | 2.255920  |
| C | 0.726570  | 1.928706  | 0.917252  |
| N | -0.050104 | 1.498530  | -0.250620 |
| N | -1.238432 | -0.998280 | -0.192560 |
| C | -1.960660 | -0.519875 | 0.992163  |
| C | -1.189173 | -0.684750 | 2.309043  |
| C | -0.196114 | 2.552385  | -1.273816 |
| C | -2.112675 | -1.661907 | -1.176197 |
| C | 2.500567  | -1.219940 | -1.238315 |
| H | 2.471037  | -2.137596 | 1.033517  |
| H | 0.727140  | -2.395997 | 0.888627  |
| H | 1.318039  | -1.589010 | 3.104439  |
| H | 2.163705  | -0.187607 | 2.441926  |
| H | -0.796828 | 1.808645  | 2.438866  |
| H | 0.860090  | 1.787258  | 3.049173  |
| H | 0.692629  | 3.023747  | 0.960130  |
| H | 1.782544  | 1.639421  | 0.803925  |
| H | -2.891002 | -1.093963 | 1.075534  |
| H | -2.240592 | 0.537460  | 0.869351  |
| H | -1.835139 | -0.297093 | 3.117160  |
| H | -1.045262 | -1.753286 | 2.505755  |
| H | 0.783097  | 2.987042  | -1.539458 |
| H | -0.576175 | 2.074673  | -2.184484 |
| H | -1.543660 | -1.767819 | -2.107348 |
| H | -2.989026 | -1.036766 | -1.417832 |
| H | 2.275131  | -0.686149 | -2.169063 |
| H | 2.384441  | -2.294287 | -1.463469 |
| C | -1.129914 | 3.675687  | -0.861827 |
| C | -0.687329 | 4.996889  | -0.799398 |

|   |           |           |           |
|---|-----------|-----------|-----------|
| C | -2.478043 | 3.422220  | -0.555137 |
| C | -1.542885 | 6.048094  | -0.447325 |
| H | 0.351149  | 5.223019  | -1.033251 |
| C | -3.342535 | 4.448273  | -0.203947 |
| H | -2.849292 | 2.401516  | -0.594764 |
| C | -2.879292 | 5.773213  | -0.146781 |
| H | -1.156083 | 7.060193  | -0.409784 |
| H | -4.385159 | 4.254684  | 0.029486  |
| C | -2.598317 | -3.031825 | -0.730719 |
| C | -3.962251 | -3.302283 | -0.658196 |
| C | -1.684225 | -4.050987 | -0.413047 |
| C | -4.429439 | -4.570680 | -0.277413 |
| H | -4.695752 | -2.536986 | -0.897701 |
| C | -2.146658 | -5.306001 | -0.036474 |
| H | -0.618327 | -3.850805 | -0.465834 |
| C | -3.517975 | -5.581776 | 0.037243  |
| H | -1.437756 | -6.094256 | 0.204794  |
| H | -3.853055 | -6.568590 | 0.335463  |
| C | 3.942326  | -0.960511 | -0.841111 |
| C | 4.866268  | -2.001653 | -0.753563 |
| C | 4.397907  | 0.342365  | -0.575305 |
| C | 6.206489  | -1.775380 | -0.416481 |
| H | 4.542017  | -3.020691 | -0.955269 |
| C | 5.720748  | 0.588875  | -0.239409 |
| H | 3.698458  | 1.172074  | -0.634699 |
| C | 6.637683  | -0.472110 | -0.156869 |
| H | 6.890376  | -2.614613 | -0.358457 |
| H | 6.075184  | 1.595167  | -0.037374 |
| C | -3.398295 | 8.064846  | 0.279923  |
| H | -4.283333 | 8.631876  | 0.574882  |
| H | -2.608505 | 8.211068  | 1.029126  |
| H | -3.041694 | 8.430128  | -0.692608 |
| C | -6.323939 | -5.965993 | 0.134852  |
| H | -7.409246 | -5.855175 | 0.093880  |
| H | -6.015026 | -6.761943 | -0.556091 |
| H | -6.026565 | -6.242114 | 1.155521  |
| C | 8.885080  | -1.154441 | 0.275289  |
| H | 9.820262  | -0.662576 | 0.549749  |
| H | 8.622480  | -1.889547 | 1.048025  |
| H | 9.016955  | -1.673942 | -0.683425 |
| O | -3.808413 | 6.709735  | 0.210578  |
| O | 7.915333  | -0.124722 | 0.182427  |
| O | -5.789146 | -4.708921 | -0.243480 |

Structure of **19**

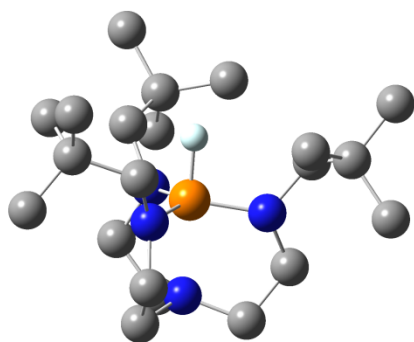

|   |           |           |           |
|---|-----------|-----------|-----------|
| P | -0.000864 | -0.000384 | 0.310769  |
| N | -0.000601 | -0.001906 | 2.453101  |
| N | 0.877164  | 1.449363  | 0.478463  |
| C | 1.527399  | 1.726347  | 1.758976  |
| C | 0.553193  | 1.317356  | 2.852094  |
| C | -1.420095 | -0.182401 | 2.851594  |
| C | -2.260912 | 0.458016  | 1.758975  |
| N | -1.695355 | 0.035052  | 0.478301  |
| N | 0.815840  | -1.485765 | 0.476950  |
| C | 0.731423  | -2.188686 | 1.756745  |
| C | 0.865258  | -1.141466 | 2.850709  |
| C | -2.573778 | 0.223443  | -0.701345 |
| C | 1.094278  | -2.338400 | -0.703746 |
| C | 1.478921  | 2.116222  | -0.701282 |
| H | -0.000994 | 0.000553  | -1.095623 |
| H | 1.750023  | 2.790965  | 1.844530  |
| H | 2.482822  | 1.184686  | 1.847329  |
| H | 1.018343  | 1.255309  | 3.841919  |
| H | -0.270401 | 2.033642  | 2.897425  |
| H | -1.628575 | -1.253864 | 2.895849  |
| H | -1.599168 | 0.250425  | 3.841829  |
| H | -3.294219 | 0.118311  | 1.843547  |
| H | -2.269804 | 1.556164  | 1.848752  |
| H | 1.541981  | -2.914013 | 1.840760  |
| H | -0.215374 | -2.745283 | 1.845302  |
| H | 0.579547  | -1.514077 | 3.840404  |
| H | 1.897419  | -0.786429 | 2.895676  |
| H | -3.225533 | 1.082695  | -0.492987 |
| H | -1.957029 | 0.513453  | -1.557908 |
| H | 0.537021  | -1.946796 | -1.560668 |
| H | 0.674924  | -3.332718 | -0.498784 |
| H | 1.419927  | 1.437844  | -1.558345 |
| H | 2.549385  | 2.249615  | -0.494316 |



|   |           |           |           |
|---|-----------|-----------|-----------|
| C | -3.444935 | -0.989230 | -1.126430 |
| C | -2.555009 | -2.160782 | -1.573938 |
| C | -4.374293 | -1.459950 | 0.007140  |
| C | -4.301772 | -0.512215 | -2.317264 |
| H | -1.904790 | -1.873578 | -2.410042 |
| H | -1.923840 | -2.519867 | -0.753146 |
| H | -3.168284 | -3.003605 | -1.911009 |
| H | -5.021071 | -0.649265 | 0.365558  |
| H | -5.028466 | -2.263700 | -0.348231 |
| H | -3.808206 | -1.858656 | 0.857379  |
| H | -4.931965 | -1.327785 | -2.687613 |
| H | -4.963254 | 0.314405  | -2.031280 |
| H | -3.677281 | -0.170944 | -3.151904 |
| C | 2.581025  | -2.486449 | -1.125744 |
| C | 3.153116  | -1.128604 | -1.565923 |
| C | 3.450283  | -3.061161 | 0.007643  |
| C | 2.598486  | -3.462243 | -2.320352 |
| H | 2.583308  | -0.705623 | -2.403007 |
| H | 3.144731  | -0.405716 | -0.742273 |
| H | 4.191143  | -1.237379 | -1.898696 |
| H | 3.069939  | -4.027549 | 0.361802  |
| H | 4.473959  | -3.225620 | -0.346315 |
| H | 3.511838  | -2.374761 | 0.860510  |
| H | 3.620757  | -3.599818 | -2.688411 |
| H | 2.211484  | -4.449108 | -2.039329 |
| H | 1.993386  | -3.088006 | -3.155124 |
| C | 0.865309  | 3.478194  | -1.123891 |
| C | -0.595684 | 3.295766  | -1.567672 |
| C | 0.926707  | 4.517326  | 0.010489  |
| C | 1.704670  | 3.981671  | -2.316279 |
| H | -0.675520 | 2.590192  | -2.404399 |
| H | -1.220175 | 2.928419  | -0.745366 |
| H | -1.018647 | 4.249266  | -1.902358 |
| H | 1.953198  | 4.669804  | 0.366936  |
| H | 0.558862  | 5.486745  | -0.343276 |
| H | 0.299568  | 4.227000  | 0.861790  |
| H | 1.314750  | 4.936784  | -2.683946 |
| H | 2.752506  | 4.138241  | -2.033104 |
| H | 1.683838  | 3.271689  | -3.152062 |

Structure of **20**

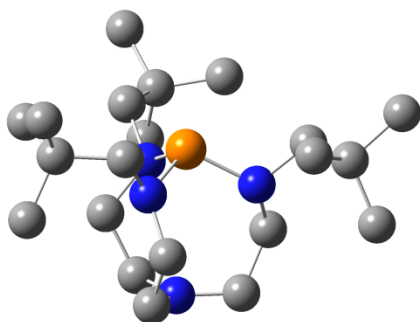

|   |           |           |           |
|---|-----------|-----------|-----------|
| P | 0.000285  | 0.000101  | -0.551442 |
| N | 0.000551  | -0.000795 | 2.771416  |
| N | 1.275887  | -0.973312 | 0.150722  |
| C | 1.075166  | -1.790260 | 1.354978  |
| C | 1.027113  | -1.012982 | 2.677656  |
| C | 0.363789  | 1.394373  | 2.678299  |
| C | 1.012914  | 1.825500  | 1.355865  |
| N | 0.205452  | 1.591170  | 0.151265  |
| N | -1.480350 | -0.618032 | 0.150952  |
| C | -2.086942 | -0.036166 | 1.355723  |
| C | -1.389338 | -0.383714 | 2.678034  |
| C | 0.294520  | 2.660958  | -0.864440 |
| C | -2.451585 | -1.074879 | -0.864907 |
| C | 2.157578  | -1.585066 | -0.865300 |
| H | 1.898262  | -2.509639 | 1.422291  |
| H | 0.147716  | -2.376676 | 1.266552  |
| H | 0.899213  | -1.759051 | 3.482696  |
| H | 1.994297  | -0.527882 | 2.853528  |
| H | -0.539897 | 1.989338  | 2.854601  |
| H | 1.073934  | 1.656217  | 3.483396  |
| H | 1.223890  | 2.898065  | 1.423791  |
| H | 1.984703  | 1.315977  | 1.267360  |
| H | -3.121513 | -0.389182 | 1.423285  |
| H | -2.130883 | 1.060274  | 1.267777  |
| H | -1.971161 | 0.099946  | 3.483394  |
| H | -1.452878 | -1.463912 | 2.853657  |
| H | 1.252006  | 3.190482  | -0.744607 |
| H | 0.325140  | 2.195336  | -1.857781 |
| H | -2.063324 | -0.815870 | -1.858218 |
| H | -3.388401 | -0.509529 | -0.745222 |
| H | 1.738833  | -1.377998 | -1.858407 |
| H | 2.137086  | -2.679112 | -0.746167 |
| C | -0.849458 | 3.713269  | -0.885540 |

|   |           |           |           |
|---|-----------|-----------|-----------|
| C | -2.180274 | 3.044777  | -1.272176 |
| C | -1.000133 | 4.415561  | 0.474624  |
| C | -0.480122 | 4.758832  | -1.956756 |
| H | -2.110762 | 2.565770  | -2.256878 |
| H | -2.464903 | 2.277377  | -0.545797 |
| H | -2.989841 | 3.783966  | -1.316183 |
| H | -0.072788 | 4.922965  | 0.770329  |
| H | -1.791582 | 5.174196  | 0.432475  |
| H | -1.264902 | 3.702318  | 1.262322  |
| H | -1.262535 | 5.522245  | -2.043471 |
| H | 0.458684  | 5.270713  | -1.709943 |
| H | -0.358473 | 4.293824  | -2.943205 |
| C | -2.792545 | -2.591330 | -0.885939 |
| C | -1.549283 | -3.410996 | -1.273171 |
| C | -3.325312 | -3.072523 | 0.474452  |
| C | -3.883467 | -2.793066 | -1.956619 |
| H | -1.169675 | -3.112114 | -2.258299 |
| H | -0.741654 | -3.274331 | -0.547493 |
| H | -1.785756 | -4.481474 | -1.316579 |
| H | -4.227912 | -2.522487 | 0.770493  |
| H | -3.587333 | -4.137079 | 0.432418  |
| H | -2.574874 | -2.945695 | 1.261880  |
| H | -4.154219 | -3.852133 | -2.043585 |
| H | -4.795612 | -2.235414 | -1.709041 |
| H | -3.541932 | -2.455074 | -2.943147 |
| C | 3.641113  | -1.121143 | -0.886351 |
| C | 3.728431  | 0.365880  | -1.271748 |
| C | 4.324960  | -1.343245 | 0.473457  |
| C | 4.361285  | -1.963277 | -1.958415 |
| H | 3.278812  | 0.546333  | -2.256220 |
| H | 3.206794  | 0.995838  | -0.544702 |
| H | 4.773589  | 0.696721  | -1.315665 |
| H | 4.300076  | -2.400235 | 0.768482  |
| H | 5.377881  | -1.037846 | 0.431212  |
| H | 3.840332  | -0.757502 | 1.261690  |
| H | 5.413778  | -1.667919 | -2.045063 |
| H | 4.334619  | -3.032438 | -1.712489 |
| H | 3.897656  | -1.835050 | -2.944682 |

## Structures of **21**

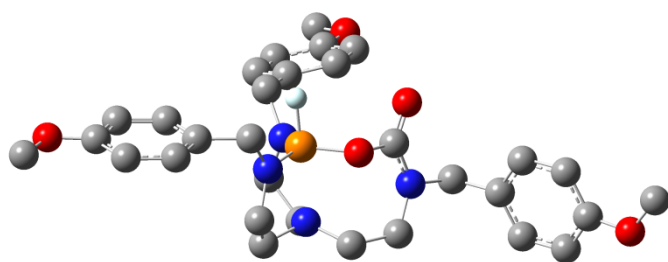

|   |           |           |           |
|---|-----------|-----------|-----------|
| P | 0.990945  | -0.388654 | -0.265634 |
| N | 0.460051  | -0.836588 | 1.818131  |
| N | 2.183613  | -1.528211 | -0.022562 |
| C | 2.332864  | -2.259034 | 1.233004  |
| C | 1.731752  | -1.404436 | 2.338277  |
| C | 0.136447  | 0.474085  | 2.430675  |
| C | 0.978419  | 1.517641  | 1.708759  |
| N | 0.981794  | 1.190886  | 0.283082  |
| N | -2.380384 | -0.524917 | 0.500103  |
| C | -2.071151 | -1.392366 | 1.642525  |
| C | -0.631924 | -1.859358 | 1.896894  |
| C | 1.404712  | 2.313348  | -0.612909 |
| C | -3.761913 | 0.031061  | 0.502355  |
| C | 3.025342  | -2.027834 | -1.146633 |
| H | 1.358589  | -0.075308 | -1.578022 |
| H | 3.397321  | -2.424131 | 1.425124  |
| H | 1.852090  | -3.245602 | 1.168856  |
| H | 1.560544  | -1.972524 | 3.259491  |
| H | 2.405744  | -0.575187 | 2.565937  |
| H | -0.916342 | 0.687006  | 2.251203  |
| H | 0.319439  | 0.466685  | 3.511497  |
| H | 0.537874  | 2.508919  | 1.843098  |
| H | 2.006898  | 1.560945  | 2.097462  |
| H | -2.678342 | -2.305642 | 1.583011  |
| H | -2.431187 | -0.855272 | 2.527695  |
| H | -0.633663 | -2.277535 | 2.912809  |
| H | -0.366959 | -2.662198 | 1.210745  |
| H | 2.431473  | 2.599214  | -0.347720 |
| H | 1.427622  | 1.928711  | -1.635806 |
| H | -3.770295 | 0.818947  | -0.251069 |
| H | -3.918771 | 0.495474  | 1.482570  |
| H | 2.716793  | -1.503042 | -2.055391 |
| H | 2.789437  | -3.088377 | -1.301198 |
| O | -0.455312 | -1.109691 | -0.599503 |
| C | -1.662180 | -0.391463 | -0.642262 |

|   |           |           |           |
|---|-----------|-----------|-----------|
| O | -1.965099 | 0.251543  | -1.621893 |
| C | 0.497171  | 3.518001  | -0.525370 |
| C | -0.815033 | 3.475312  | -1.031646 |
| C | 0.953643  | 4.712568  | 0.036704  |
| C | -1.634288 | 4.591227  | -0.968711 |
| H | -1.194533 | 2.562190  | -1.483101 |
| C | 0.141108  | 5.847787  | 0.103520  |
| H | 1.969710  | 4.773892  | 0.422003  |
| C | -1.163806 | 5.789715  | -0.400988 |
| H | -2.644324 | 4.571050  | -1.365576 |
| H | 0.532964  | 6.759127  | 0.539479  |
| C | -4.829179 | -1.005373 | 0.231699  |
| C | -5.048911 | -1.478962 | -1.067289 |
| C | -5.622234 | -1.519574 | 1.269223  |
| C | -6.022013 | -2.442095 | -1.333036 |
| H | -4.456661 | -1.084771 | -1.889342 |
| C | -6.596919 | -2.477403 | 1.022028  |
| H | -5.487623 | -1.153393 | 2.285368  |
| C | -6.803868 | -2.948692 | -0.284008 |
| H | -6.170625 | -2.780359 | -2.351843 |
| H | -7.218340 | -2.871176 | 1.819808  |
| C | 4.507244  | -1.854898 | -0.902941 |
| C | 5.345957  | -2.962914 | -0.766997 |
| C | 5.083633  | -0.574708 | -0.828700 |
| C | 6.721718  | -2.820308 | -0.564502 |
| H | 4.928070  | -3.965536 | -0.831375 |
| C | 6.444037  | -0.412351 | -0.624157 |
| H | 4.457373  | 0.308126  | -0.942030 |
| C | 7.278633  | -1.537839 | -0.490793 |
| H | 7.340541  | -3.704728 | -0.470044 |
| H | 6.896204  | 0.573012  | -0.574441 |
| O | -2.045095 | 6.819985  | -0.393235 |
| O | -7.778370 | -3.882200 | -0.425333 |
| O | 8.592850  | -1.271136 | -0.296913 |
| C | -1.624903 | 8.075382  | 0.130713  |
| H | -0.772426 | 8.476915  | -0.430929 |
| H | -2.479537 | 8.743646  | 0.019533  |
| H | -1.359641 | 7.997146  | 1.192626  |
| C | -8.064337 | -4.380560 | -1.727579 |
| H | -8.875361 | -5.098238 | -1.598222 |
| H | -8.392005 | -3.577957 | -2.399887 |
| H | -7.194361 | -4.889107 | -2.162007 |
| C | 9.503443  | -2.361094 | -0.186773 |
| H | 10.487825 | -1.911456 | -0.052809 |

|   |          |           |           |
|---|----------|-----------|-----------|
| H | 9.269382 | -2.990912 | 0.680580  |
| H | 9.502835 | -2.974152 | -1.096322 |

Structure of **22**

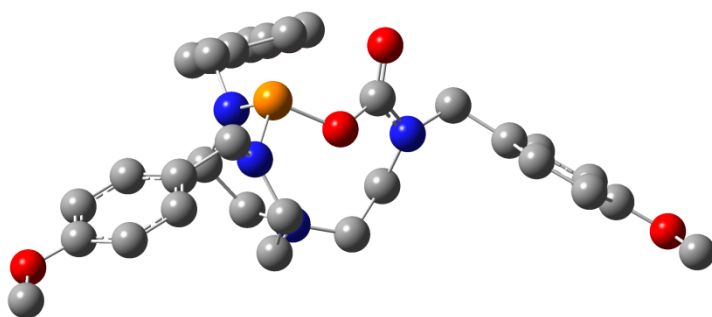

|   |           |           |           |
|---|-----------|-----------|-----------|
| P | -1.393080 | 0.235997  | 1.516369  |
| N | -0.513303 | -0.416007 | -1.522619 |
| N | -2.505654 | -0.823390 | 0.730985  |
| C | -2.123452 | -1.855036 | -0.250593 |
| C | -1.656221 | -1.303106 | -1.607289 |
| C | -0.720008 | 0.965239  | -1.885234 |
| C | -1.703820 | 1.650385  | -0.921404 |
| N | -1.317467 | 1.605969  | 0.491930  |
| N | 2.190847  | -0.607190 | 0.547708  |
| C | 1.968723  | -0.355060 | -0.892424 |
| C | 0.797137  | -1.022844 | -1.639845 |
| C | -1.041222 | 2.901459  | 1.139908  |
| C | 3.587948  | -0.411159 | 0.962273  |
| C | -3.654042 | -1.208472 | 1.573911  |
| H | -3.013459 | -2.468543 | -0.433783 |
| H | -1.350834 | -2.515507 | 0.166577  |
| H | -1.440554 | -2.164514 | -2.263005 |
| H | -2.492316 | -0.769702 | -2.074771 |
| H | 0.236038  | 1.493858  | -1.843260 |
| H | -1.108896 | 1.091258  | -2.917790 |
| H | -1.812150 | 2.700407  | -1.216613 |
| H | -2.691585 | 1.184900  | -1.029862 |
| H | 2.874360  | -0.729396 | -1.378906 |
| H | 1.957926  | 0.731230  | -1.062239 |
| H | 1.124180  | -1.073824 | -2.699270 |
| H | 0.721421  | -2.057726 | -1.292250 |
| H | -1.890744 | 3.579106  | 0.967244  |
| H | -0.994472 | 2.719087  | 2.219752  |
| H | 3.582946  | -0.385701 | 2.053944  |
| H | 3.945188  | 0.573452  | 0.623338  |
| H | -3.686607 | -0.518280 | 2.425797  |
| H | -3.506230 | -2.214628 | 1.999162  |
| O | -0.001342 | -0.696834 | 1.066010  |

|   |           |           |           |
|---|-----------|-----------|-----------|
| C | 1.233369  | -0.388342 | 1.518483  |
| O | 1.471158  | -0.023205 | 2.660997  |
| C | 0.235019  | 3.585916  | 0.682187  |
| C | 1.491130  | 3.170103  | 1.159268  |
| C | 0.199020  | 4.650009  | -0.220162 |
| C | 2.658940  | 3.788820  | 0.733806  |
| H | 1.553349  | 2.357091  | 1.878722  |
| C | 1.365913  | 5.284027  | -0.663125 |
| H | -0.760768 | 5.009136  | -0.586984 |
| C | 2.605480  | 4.848890  | -0.186019 |
| H | 3.629199  | 3.479946  | 1.111383  |
| H | 1.292193  | 6.107878  | -1.364024 |
| C | 4.517465  | -1.493175 | 0.447868  |
| C | 4.224195  | -2.846942 | 0.637940  |
| C | 5.718961  | -1.166397 | -0.196237 |
| C | 5.093753  | -3.850902 | 0.207935  |
| H | 3.294085  | -3.125369 | 1.126579  |
| C | 6.600735  | -2.151525 | -0.627370 |
| H | 5.970903  | -0.120729 | -0.360570 |
| C | 6.293148  | -3.503600 | -0.427312 |
| H | 4.830625  | -4.889431 | 0.374493  |
| H | 7.530982  | -1.898140 | -1.126373 |
| C | -4.981980 | -1.171508 | 0.840499  |
| C | -5.791679 | -2.303232 | 0.750887  |
| C | -5.445806 | 0.016096  | 0.249111  |
| C | -7.030749 | -2.274844 | 0.099166  |
| H | -5.457791 | -3.235905 | 1.201251  |
| C | -6.669530 | 0.065899  | -0.401425 |
| H | -4.832356 | 0.911796  | 0.305349  |
| C | -7.473388 | -1.083577 | -0.481595 |
| H | -7.628273 | -3.178123 | 0.051093  |
| H | -7.032547 | 0.983048  | -0.855342 |
| O | 3.810544  | 5.386361  | -0.541080 |
| O | 7.217584  | -4.398707 | -0.887499 |
| O | -8.658437 | -0.930869 | -1.144073 |
| C | 3.816183  | 6.473702  | -1.450784 |
| H | 3.268479  | 7.337953  | -1.051656 |
| H | 4.864709  | 6.744462  | -1.588636 |
| H | 3.384478  | 6.192485  | -2.420874 |
| C | 6.961124  | -5.781097 | -0.704323 |
| H | 7.816823  | -6.304373 | -1.135291 |
| H | 6.877041  | -6.039957 | 0.359641  |
| H | 6.045847  | -6.095846 | -1.223555 |
| C | -9.516228 | -2.055069 | -1.247811 |



|   |            |           |           |
|---|------------|-----------|-----------|
| H | -10.393514 | -1.713281 | -1.800280 |
| H | -9.040154  | -2.878061 | -1.797697 |
| H | -9.829047  | -2.417621 | -0.259439 |

### Structure of TS17-23

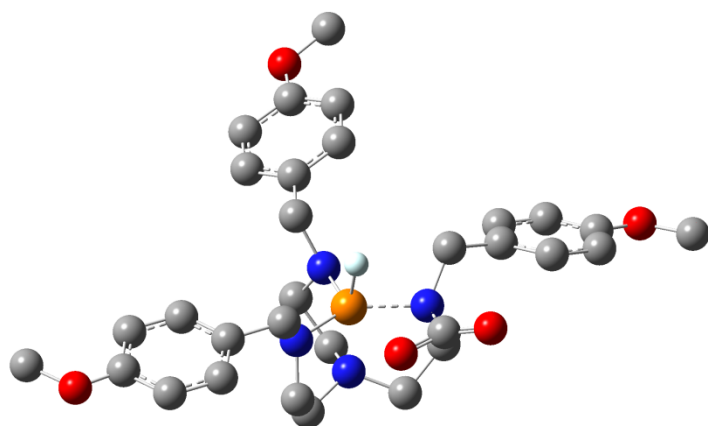

|   |           |           |           |
|---|-----------|-----------|-----------|
| P | 0.634785  | -0.827823 | -0.002108 |
| N | 0.515879  | -1.263981 | 2.030303  |
| N | 2.333064  | -1.012944 | 0.179610  |
| C | 2.734718  | -1.946144 | 1.233045  |
| C | 1.912051  | -1.602464 | 2.466447  |
| C | 0.027880  | 0.001695  | 2.670713  |
| C | 0.482734  | 1.153401  | 1.790680  |
| N | 0.182236  | 0.773301  | 0.411731  |
| N | -1.103078 | -1.740001 | -0.092730 |
| C | -1.634414 | -2.098365 | 1.249192  |
| C | -0.456808 | -2.378331 | 2.180007  |
| C | 0.477153  | 1.854609  | -0.576513 |
| C | -2.112574 | -1.003309 | -0.979391 |
| C | 3.113346  | -1.192908 | -1.080637 |
| H | 0.575505  | -0.652150 | -1.395678 |
| H | 3.796312  | -1.805249 | 1.451296  |
| H | 2.583917  | -2.986077 | 0.913948  |
| H | 1.881046  | -2.416705 | 3.196139  |
| H | 2.326740  | -0.716595 | 2.950495  |
| H | -1.060998 | -0.024719 | 2.711535  |
| H | 0.410846  | 0.065309  | 3.693380  |
| H | -0.063805 | 2.063667  | 2.050724  |
| H | 1.558137  | 1.357038  | 1.925179  |
| H | -2.272894 | -2.979243 | 1.148194  |
| H | -2.262947 | -1.281693 | 1.608463  |
| H | -0.789915 | -2.447296 | 3.220954  |
| H | 0.048337  | -3.306799 | 1.909883  |
| O | -1.308388 | -3.837136 | -1.274923 |
| C | -0.533642 | -3.077480 | -0.754008 |
| O | 0.705702  | -3.025571 | -0.535361 |
| C | -3.568440 | -1.282458 | -0.708173 |

|   |           |           |           |
|---|-----------|-----------|-----------|
| H | -1.908119 | 0.057340  | -0.818025 |
| H | -1.838688 | -1.268231 | -2.002589 |
| C | -4.340221 | -0.332537 | -0.014520 |
| C | -5.690850 | -0.540225 | 0.223824  |
| C | -6.312737 | -1.714807 | -0.232987 |
| C | -5.556710 | -2.668574 | -0.932026 |
| C | -4.200114 | -2.446489 | -1.165298 |
| H | -3.879439 | 0.593349  | 0.325367  |
| H | -6.292351 | 0.193546  | 0.750428  |
| O | -7.632058 | -1.826223 | 0.045744  |
| H | -6.014595 | -3.577881 | -1.303092 |
| H | -3.623586 | -3.193379 | -1.700935 |
| C | -8.337160 | -2.978785 | -0.410026 |
| H | -9.367439 | -2.843167 | -0.079826 |
| H | -8.310886 | -3.054503 | -1.503686 |
| H | -7.929814 | -3.896017 | 0.032380  |
| C | -0.401896 | 3.072320  | -0.401451 |
| H | 1.535790  | 2.144460  | -0.492325 |
| H | 0.334772  | 1.437108  | -1.577651 |
| C | 0.061571  | 4.202281  | 0.292296  |
| C | -0.738016 | 5.324637  | 0.459471  |
| C | -2.036505 | 5.350919  | -0.075036 |
| C | -2.512539 | 4.236485  | -0.781967 |
| C | -1.693255 | 3.117830  | -0.937396 |
| H | 1.072046  | 4.209428  | 0.696107  |
| H | -0.378173 | 6.200845  | 0.988898  |
| O | -2.737558 | 6.490500  | 0.137666  |
| H | -3.502159 | 4.237979  | -1.223587 |
| H | -2.071073 | 2.274631  | -1.511675 |
| C | -4.047707 | 6.603218  | -0.409479 |
| H | -4.403601 | 7.593092  | -0.122129 |
| H | -4.031190 | 6.525083  | -1.503475 |
| H | -4.720232 | 5.840673  | 0.003079  |
| C | 4.577216  | -0.864307 | -0.888617 |
| H | 2.996469  | -2.222854 | -1.441743 |
| H | 2.680733  | -0.526925 | -1.833674 |
| C | 5.552756  | -1.869579 | -0.974759 |
| C | 6.901476  | -1.577166 | -0.819984 |
| C | 7.312333  | -0.258490 | -0.569946 |
| C | 6.349488  | 0.758308  | -0.478056 |
| C | 4.999883  | 0.445203  | -0.638732 |
| H | 5.252562  | -2.895086 | -1.178057 |
| H | 7.658674  | -2.350917 | -0.894010 |
| O | 8.649166  | -0.073092 | -0.435246 |

|   |           |          |           |
|---|-----------|----------|-----------|
| H | 6.641158  | 1.785725 | -0.293770 |
| H | 4.264514  | 1.244249 | -0.571496 |
| C | 9.139473  | 1.243883 | -0.210783 |
| H | 10.224180 | 1.149265 | -0.148675 |
| H | 8.879353  | 1.914097 | -1.039568 |
| H | 8.756472  | 1.659257 | 0.730080  |

Structure of **23**

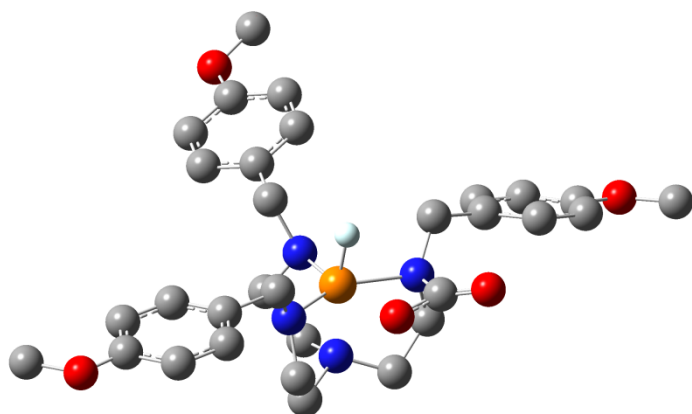

|   |           |           |           |
|---|-----------|-----------|-----------|
| P | 0.613335  | -0.917259 | -0.074391 |
| N | 0.486118  | -1.329564 | 1.937130  |
| N | 2.320090  | -1.104353 | 0.103408  |
| C | 2.667989  | -2.140052 | 1.076810  |
| C | 1.847246  | -1.855064 | 2.333122  |
| C | 0.192738  | -0.012323 | 2.603226  |
| C | 0.714374  | 1.084257  | 1.692211  |
| N | 0.275056  | 0.729956  | 0.348805  |
| N | -1.381862 | -1.580421 | -0.069270 |
| C | -1.831846 | -1.878610 | 1.316109  |
| C | -0.626800 | -2.296106 | 2.161874  |
| C | 0.590773  | 1.769408  | -0.671297 |
| C | -2.390633 | -0.802765 | -0.891254 |
| C | 3.106060  | -1.185754 | -1.158809 |
| H | 0.486380  | -0.694001 | -1.456988 |
| H | 3.731854  | -2.066387 | 1.317614  |
| H | 2.477469  | -3.150182 | 0.688475  |
| H | 1.722793  | -2.738768 | 2.964302  |
| H | 2.334791  | -1.075529 | 2.919877  |
| H | -0.886964 | 0.087110  | 2.711723  |
| H | 0.642715  | -0.001841 | 3.599370  |
| H | 0.286765  | 2.046509  | 1.986905  |
| H | 1.812381  | 1.164530  | 1.753570  |
| H | -2.581168 | -2.675128 | 1.299342  |
| H | -2.319576 | -0.982324 | 1.703242  |
| H | -0.892631 | -2.306675 | 3.224121  |
| H | -0.273645 | -3.291010 | 1.887924  |
| O | -1.522925 | -3.680282 | -1.228920 |
| C | -0.861365 | -2.842892 | -0.682291 |
| O | 0.424755  | -2.772676 | -0.450093 |
| C | -3.845368 | -1.114100 | -0.641885 |

|   |           |           |           |
|---|-----------|-----------|-----------|
| H | -2.180915 | 0.242768  | -0.648180 |
| H | -2.113432 | -0.977449 | -1.934340 |
| C | -4.633370 | -0.211676 | 0.094178  |
| C | -5.980320 | -0.453101 | 0.321995  |
| C | -6.581988 | -1.615938 | -0.187922 |
| C | -5.809652 | -2.523882 | -0.928866 |
| C | -4.457401 | -2.266635 | -1.151476 |
| H | -4.188621 | 0.704550  | 0.478392  |
| H | -6.593768 | 0.245235  | 0.881898  |
| O | -7.899274 | -1.763170 | 0.084869  |
| H | -6.251514 | -3.423562 | -1.340586 |
| H | -3.871509 | -2.979802 | -1.722533 |
| C | -8.583935 | -2.905774 | -0.423297 |
| H | -9.616445 | -2.803547 | -0.088045 |
| H | -8.556570 | -2.931292 | -1.519308 |
| H | -8.160617 | -3.835051 | -0.022843 |
| C | -0.170924 | 3.059476  | -0.460477 |
| H | 1.673092  | 1.974517  | -0.666713 |
| H | 0.345312  | 1.357408  | -1.655179 |
| C | 0.420773  | 4.145982  | 0.204489  |
| C | -0.270188 | 5.333390  | 0.404265  |
| C | -1.585321 | 5.471575  | -0.068331 |
| C | -2.188670 | 4.402304  | -0.746601 |
| C | -1.477220 | 3.216592  | -0.934547 |
| H | 1.446678  | 4.066540  | 0.558606  |
| H | 0.188924  | 6.175771  | 0.911420  |
| O | -2.174485 | 6.668567  | 0.171659  |
| H | -3.194216 | 4.489327  | -1.141323 |
| H | -1.951805 | 2.408237  | -1.486747 |
| C | -3.493215 | 6.893831  | -0.315623 |
| H | -3.748776 | 7.911233  | -0.017634 |
| H | -3.534115 | 6.813187  | -1.408890 |
| H | -4.210042 | 6.193112  | 0.130849  |
| C | 4.585084  | -0.964407 | -0.928868 |
| H | 2.947277  | -2.159608 | -1.645566 |
| H | 2.716812  | -0.416648 | -1.834617 |
| C | 5.508665  | -1.994028 | -1.164447 |
| C | 6.870426  | -1.796215 | -0.975698 |
| C | 7.347218  | -0.550583 | -0.539292 |
| C | 6.436965  | 0.489260  | -0.295732 |
| C | 5.073447  | 0.271637  | -0.493403 |
| H | 5.157279  | -2.963518 | -1.510684 |
| H | 7.587187  | -2.589092 | -1.163203 |
| O | 8.691944  | -0.454594 | -0.385250 |

|   |           |          |           |
|---|-----------|----------|-----------|
| H | 6.779925  | 1.462755 | 0.035034  |
| H | 4.378996  | 1.087708 | -0.305655 |
| C | 9.246890  | 0.788751 | 0.027626  |
| H | 10.325353 | 0.632019 | 0.070704  |
| H | 9.023483  | 1.585690 | -0.692689 |
| H | 8.882305  | 1.080638 | 1.020831  |

Structure of TS23-21

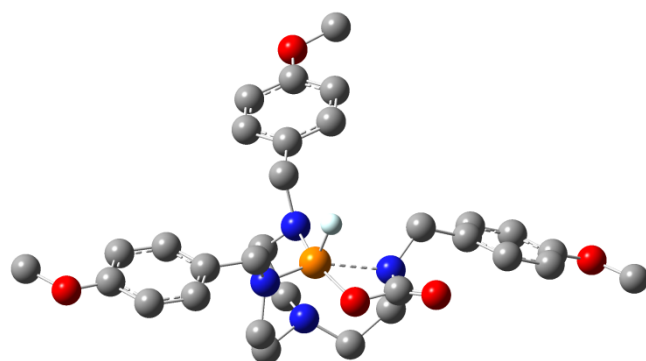

|   |           |           |           |
|---|-----------|-----------|-----------|
| P | 0.705094  | -0.821362 | -0.122177 |
| N | 0.516618  | -1.240252 | 1.874806  |
| N | 2.393190  | -1.069437 | 0.068774  |
| C | 2.688278  | -2.114366 | 1.050317  |
| C | 1.868444  | -1.778773 | 2.293714  |
| C | 0.221410  | 0.070670  | 2.548246  |
| C | 0.778457  | 1.169457  | 1.659333  |
| N | 0.381953  | 0.815231  | 0.305501  |
| N | -1.460247 | -1.476285 | -0.117278 |
| C | -1.831434 | -1.800191 | 1.282160  |
| C | -0.598413 | -2.211403 | 2.090518  |
| C | 0.637324  | 1.869531  | -0.713985 |
| C | -2.527640 | -0.737058 | -0.880860 |
| C | 3.202404  | -1.156760 | -1.178255 |
| H | 0.567063  | -0.576974 | -1.499669 |
| H | 3.752127  | -2.084815 | 1.300505  |
| H | 2.456577  | -3.118468 | 0.668162  |
| H | 1.724095  | -2.639443 | 2.951958  |
| H | 2.368502  | -0.989276 | 2.856082  |
| H | -0.859289 | 0.182187  | 2.628386  |
| H | 0.646572  | 0.066063  | 3.555251  |
| H | 0.342798  | 2.131853  | 1.941113  |
| H | 1.873902  | 1.247126  | 1.756767  |
| H | -2.571319 | -2.607303 | 1.307098  |
| H | -2.315084 | -0.914122 | 1.698392  |
| H | -0.844118 | -2.237526 | 3.157656  |
| H | -0.243163 | -3.200121 | 1.799354  |
| O | -1.475162 | -3.475050 | -1.428142 |
| C | -0.890603 | -2.660449 | -0.769791 |
| O | 0.402354  | -2.602785 | -0.480210 |
| C | -3.959403 | -1.130848 | -0.603564 |
| H | -2.370918 | 0.314242  | -0.619024 |



|   |           |           |           |
|---|-----------|-----------|-----------|
| H | -2.274738 | -0.864280 | -1.937162 |
| C | -4.780333 | -0.284900 | 0.161931  |
| C | -6.105521 | -0.606328 | 0.418691  |
| C | -6.651085 | -1.796303 | -0.090697 |
| C | -5.845591 | -2.649970 | -0.859890 |
| C | -4.516062 | -2.311855 | -1.111286 |
| H | -4.379943 | 0.650701  | 0.548367  |
| H | -6.744267 | 0.048959  | 1.001935  |
| O | -7.951565 | -2.022958 | 0.211460  |
| H | -6.244501 | -3.569522 | -1.271739 |
| H | -3.903575 | -2.982313 | -1.706006 |
| C | -8.580219 | -3.197121 | -0.295604 |
| H | -9.609010 | -3.159363 | 0.063904  |
| H | -8.576946 | -3.208895 | -1.392282 |
| H | -8.094843 | -4.105103 | 0.083001  |
| C | -0.180740 | 3.123161  | -0.497467 |
| H | 1.709071  | 2.122764  | -0.717029 |
| H | 0.405339  | 1.445920  | -1.696315 |
| C | 0.360518  | 4.229169  | 0.178432  |
| C | -0.382139 | 5.384109  | 0.382885  |
| C | -1.699403 | 5.469063  | -0.096611 |
| C | -2.252254 | 4.380131  | -0.786686 |
| C | -1.489602 | 3.227398  | -0.978686 |
| H | 1.387449  | 4.191913  | 0.536680  |
| H | 0.037504  | 6.241828  | 0.898435  |
| O | -2.340828 | 6.637545  | 0.148673  |
| H | -3.258107 | 4.427214  | -1.187350 |
| H | -1.924470 | 2.403184  | -1.539834 |
| C | -3.664999 | 6.810238  | -0.345645 |
| H | -3.965584 | 7.813382  | -0.041463 |
| H | -3.695406 | 6.736681  | -1.439724 |
| H | -4.353934 | 6.075988  | 0.090688  |
| C | 4.681218  | -0.977338 | -0.916009 |
| H | 3.027391  | -2.119916 | -1.680246 |
| H | 2.845207  | -0.369772 | -1.851497 |
| C | 5.582319  | -2.027782 | -1.146699 |
| C | 6.944560  | -1.868046 | -0.927939 |
| C | 7.444343  | -0.640876 | -0.465601 |
| C | 6.556519  | 0.419368  | -0.226686 |
| C | 5.192218  | 0.240062  | -0.454641 |
| H | 5.213127  | -2.983219 | -1.512937 |
| H | 7.644287  | -2.676916 | -1.111369 |
| O | 8.787474  | -0.582117 | -0.283187 |
| H | 6.917850  | 1.379284  | 0.123598  |

|   |           |          |           |
|---|-----------|----------|-----------|
| H | 4.515198  | 1.071496 | -0.270484 |
| C | 9.366268  | 0.640958 | 0.156946  |
| H | 10.439112 | 0.455127 | 0.219718  |
| H | 9.178665  | 1.452375 | -0.557362 |
| H | 8.989143  | 0.929922 | 1.146296  |

Structure of TS19-24

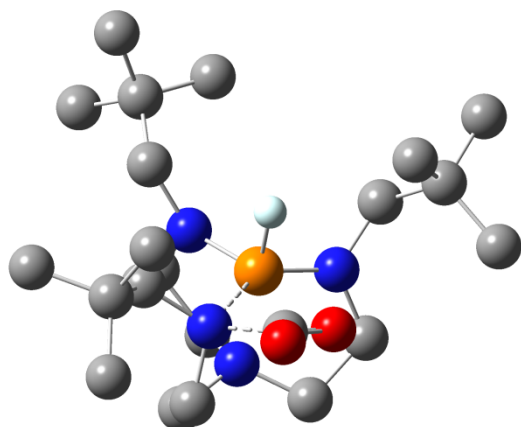

|   |           |           |           |
|---|-----------|-----------|-----------|
| P | -0.335091 | -0.227575 | 0.365333  |
| N | -0.096073 | -0.570386 | 2.345727  |
| N | -0.229030 | 1.442596  | 0.719118  |
| C | -0.237077 | 1.853675  | 2.118540  |
| C | -0.685204 | 0.659770  | 2.960196  |
| C | -0.908468 | -1.792606 | 2.600907  |
| C | -2.188642 | -1.656518 | 1.759736  |
| N | -1.912267 | -0.769313 | 0.636645  |
| N | 1.606611  | -0.910151 | 0.234652  |
| C | 2.084284  | -1.403691 | 1.560883  |
| C | 1.342485  | -0.687025 | 2.683969  |
| C | -3.014978 | -0.469057 | -0.300854 |
| C | 2.520074  | 0.125272  | -0.371512 |
| C | 0.154329  | 2.455046  | -0.287307 |
| H | -0.325625 | -0.072966 | -1.028678 |
| H | -0.945088 | 2.667938  | 2.284104  |
| H | 0.752278  | 2.227754  | 2.427163  |
| H | -0.363093 | 0.738671  | 4.003090  |
| H | -1.769465 | 0.559679  | 2.934483  |
| H | -0.324629 | -2.650965 | 2.270743  |
| H | -1.117302 | -1.884418 | 3.671071  |
| H | -2.500446 | -2.651633 | 1.432008  |
| H | -3.009221 | -1.236704 | 2.359684  |
| H | 3.155162  | -1.233520 | 1.661762  |
| H | 1.920114  | -2.480857 | 1.619309  |
| H | 1.457667  | -1.222962 | 3.631333  |
| H | 1.735295  | 0.322664  | 2.818285  |
| H | -3.905743 | -0.359480 | 0.333910  |
| H | -2.828256 | 0.524976  | -0.721012 |
| H | 2.715637  | 0.829181  | 0.445941  |
| H | 1.921379  | 0.654918  | -1.114526 |

|   |           |           |           |
|---|-----------|-----------|-----------|
| H | 0.183546  | 1.937588  | -1.250734 |
| H | 1.179438  | 2.798291  | -0.079957 |
| C | -3.361662 | -1.437567 | -1.468743 |
| C | -2.284605 | -1.404274 | -2.569602 |
| C | -3.552928 | -2.888665 | -0.991623 |
| C | -4.690952 | -0.914254 | -2.055140 |
| H | -2.114756 | -0.382500 | -2.934555 |
| H | -1.337235 | -1.821485 | -2.217129 |
| H | -2.603415 | -2.005415 | -3.428379 |
| H | -4.294742 | -2.957781 | -0.185687 |
| H | -3.915886 | -3.509533 | -1.818332 |
| H | -2.608702 | -3.324546 | -0.649491 |
| H | -4.989484 | -1.518166 | -2.918363 |
| H | -5.503401 | -0.961292 | -1.319765 |
| H | -4.603111 | 0.125607  | -2.394351 |
| C | 3.882282  | -0.220583 | -1.070169 |
| C | 4.728139  | -1.283383 | -0.346969 |
| C | 3.663770  | -0.628583 | -2.542408 |
| C | 4.655741  | 1.120420  | -1.059665 |
| H | 4.996588  | -0.976748 | 0.672825  |
| H | 4.225311  | -2.253186 | -0.318264 |
| H | 5.670928  | -1.419303 | -0.887671 |
| H | 3.100811  | 0.143372  | -3.082933 |
| H | 4.633220  | -0.732086 | -3.041872 |
| H | 3.134286  | -1.576767 | -2.631865 |
| H | 5.594924  | 1.012132  | -1.611328 |
| H | 4.084444  | 1.923750  | -1.541511 |
| H | 4.902974  | 1.440787  | -0.039864 |
| C | -0.743368 | 3.717483  | -0.486289 |
| C | -2.228675 | 3.343595  | -0.598449 |
| C | -0.541954 | 4.780596  | 0.616220  |
| C | -0.270584 | 4.339123  | -1.821073 |
| H | -2.406309 | 2.661470  | -1.438730 |
| H | -2.600916 | 2.863723  | 0.313818  |
| H | -2.834744 | 4.239359  | -0.772471 |
| H | 0.522099  | 4.972125  | 0.800800  |
| H | -0.993603 | 5.728159  | 0.303629  |
| H | -1.010732 | 4.513254  | 1.568198  |
| H | -0.828191 | 5.257209  | -2.032442 |
| H | 0.794208  | 4.600745  | -1.788661 |
| H | -0.426049 | 3.654031  | -2.663067 |
| C | 1.181520  | -2.259266 | -0.556800 |
| O | -0.014425 | -2.423368 | -0.209872 |
| O | 2.001969  | -2.851348 | -1.204702 |

Structure of 24

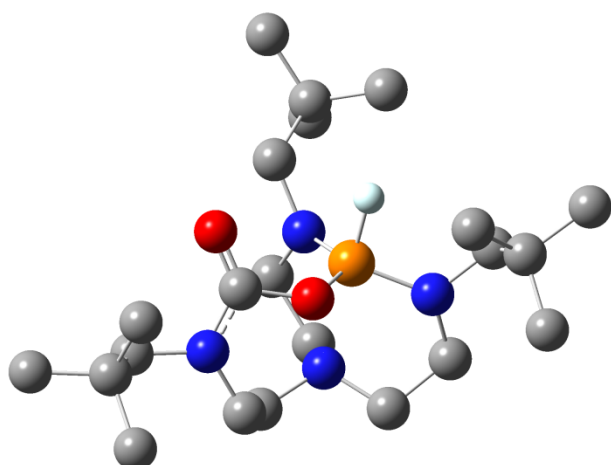

|   |           |           |           |
|---|-----------|-----------|-----------|
| P | -0.887783 | -0.038446 | 0.069603  |
| N | 0.027989  | -0.243353 | 2.173220  |
| N | -0.976566 | 1.571286  | 0.516822  |
| C | -0.548780 | 2.064620  | 1.830281  |
| C | -0.619175 | 0.917120  | 2.827143  |
| C | -0.507892 | -1.549246 | 2.604664  |
| C | -1.891975 | -1.727054 | 2.001060  |
| N | -1.879419 | -1.261682 | 0.611439  |
| N | 2.666421  | -0.078603 | 0.154574  |
| C | 2.430453  | -0.872233 | 1.367075  |
| C | 1.514749  | -0.178916 | 2.390295  |
| C | -3.053533 | -1.681335 | -0.209775 |
| C | 3.941397  | 0.642679  | -0.036619 |
| C | -1.125916 | 2.612966  | -0.546608 |
| H | -1.475525 | 0.123230  | -1.183548 |
| H | -1.209551 | 2.872789  | 2.149047  |
| H | 0.466478  | 2.482215  | 1.766393  |
| H | -0.136474 | 1.168696  | 3.779368  |
| H | -1.663688 | 0.671517  | 3.033589  |
| H | 0.160708  | -2.322577 | 2.218106  |
| H | -0.532639 | -1.630976 | 3.699668  |
| H | -2.160834 | -2.784781 | 2.023933  |
| H | -2.659316 | -1.189024 | 2.576884  |
| H | 3.400056  | -1.002244 | 1.851000  |
| H | 2.071760  | -1.871008 | 1.106411  |
| H | 1.708509  | -0.605215 | 3.384970  |
| H | 1.800727  | 0.874797  | 2.435572  |
| H | -3.877790 | -1.840673 | 0.495955  |
| H | -3.359386 | -0.847234 | -0.848239 |
| H | 4.306858  | 0.926141  | 0.957956  |
| H | 3.704194  | 1.561786  | -0.577994 |

|   |           |           |           |
|---|-----------|-----------|-----------|
| H | -0.796536 | 2.186582  | -1.497986 |
| H | -0.394138 | 3.394162  | -0.307000 |
| C | -2.872176 | -2.943403 | -1.092464 |
| C | -1.844621 | -2.687625 | -2.210289 |
| C | -2.432833 | -4.162272 | -0.261238 |
| C | -4.251791 | -3.226578 | -1.722952 |
| H | -2.141002 | -1.841987 | -2.843364 |
| H | -0.844650 | -2.485049 | -1.811824 |
| H | -1.765047 | -3.566954 | -2.858594 |
| H | -3.146983 | -4.386982 | 0.541149  |
| H | -2.371261 | -5.051200 | -0.898276 |
| H | -1.440792 | -4.014223 | 0.181709  |
| H | -4.196915 | -4.098650 | -2.382929 |
| H | -5.010095 | -3.435735 | -0.958709 |
| H | -4.602081 | -2.378804 | -2.324158 |
| C | 5.049881  | -0.129091 | -0.798277 |
| C | 5.463488  | -1.405024 | -0.041599 |
| C | 4.575120  | -0.498630 | -2.215504 |
| C | 6.258259  | 0.824370  | -0.889862 |
| H | 5.803766  | -1.181075 | 0.978005  |
| H | 4.642142  | -2.129231 | 0.017085  |
| H | 6.291961  | -1.901116 | -0.558737 |
| H | 4.263222  | 0.386904  | -2.779133 |
| H | 5.384942  | -0.986038 | -2.769546 |
| H | 3.730350  | -1.196377 | -2.190044 |
| H | 7.085492  | 0.341712  | -1.420959 |
| H | 6.004438  | 1.741723  | -1.434046 |
| H | 6.624399  | 1.109842  | 0.104214  |
| C | -2.525678 | 3.253861  | -0.728944 |
| C | -3.558046 | 2.209384  | -1.187962 |
| C | -3.030426 | 3.932646  | 0.557871  |
| C | -2.358402 | 4.321977  | -1.830974 |
| H | -3.249691 | 1.718328  | -2.119448 |
| H | -3.719915 | 1.440175  | -0.423193 |
| H | -4.526097 | 2.686567  | -1.375062 |
| H | -2.313186 | 4.671877  | 0.935654  |
| H | -3.969398 | 4.461890  | 0.362205  |
| H | -3.234225 | 3.203832  | 1.351467  |
| H | -3.315900 | 4.812771  | -2.034896 |
| H | -1.643991 | 5.098520  | -1.532740 |
| H | -2.003695 | 3.880367  | -2.769765 |
| C | 1.645348  | 0.168962  | -0.696435 |
| O | 0.556456  | -0.675922 | -0.382132 |
| O | 1.595278  | 0.959774  | -1.610353 |

Structure of TS20-25

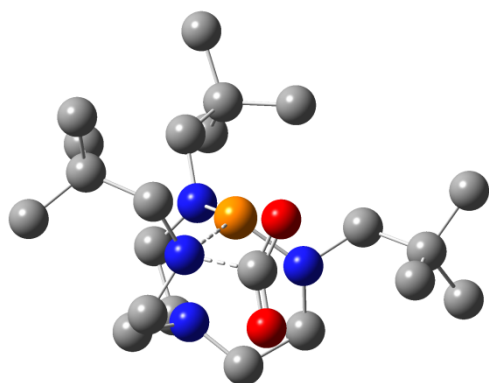

|   |           |           |           |
|---|-----------|-----------|-----------|
| P | -0.026084 | 0.156940  | -0.109863 |
| N | 0.313101  | -0.433137 | 2.245802  |
| N | -1.618418 | -0.303835 | 0.393906  |
| C | -2.053556 | -0.514633 | 1.764418  |
| C | -0.918109 | -1.171595 | 2.542301  |
| C | 1.552407  | -1.203780 | 2.335768  |
| C | 1.602377  | -2.273224 | 1.239349  |
| N | 1.165368  | -1.757148 | -0.057691 |
| N | 0.511800  | 1.676528  | 0.627956  |
| C | 1.043891  | 1.865145  | 1.972013  |
| C | 0.388721  | 0.867551  | 2.914315  |
| C | 2.170944  | -1.799422 | -1.154879 |
| C | 0.999953  | 2.658930  | -0.353629 |
| C | -2.648343 | 0.115287  | -0.583704 |
| H | -2.908488 | -1.193136 | 1.782866  |
| H | -2.384365 | 0.428598  | 2.235873  |
| H | -1.129578 | -1.193021 | 3.622310  |
| H | -0.808133 | -2.193820 | 2.179636  |
| H | 2.384532  | -0.500672 | 2.223666  |
| H | 1.652770  | -1.677863 | 3.325482  |
| H | 2.612988  | -2.681811 | 1.192279  |
| H | 0.934717  | -3.099061 | 1.497240  |
| H | 0.846334  | 2.877224  | 2.337596  |
| H | 2.142516  | 1.747229  | 1.968708  |
| H | 0.934249  | 0.800329  | 3.867452  |
| H | -0.627535 | 1.199907  | 3.138128  |
| H | 2.358396  | -2.863111 | -1.366619 |
| H | 1.641980  | -1.412114 | -2.027844 |
| H | 1.046949  | 2.159945  | -1.328869 |
| H | 2.031228  | 2.944247  | -0.091992 |
| H | -2.119984 | 0.217294  | -1.537042 |
| H | -3.014894 | 1.122153  | -0.319550 |

|   |           |           |           |
|---|-----------|-----------|-----------|
| C | 3.568976  | -1.109135 | -1.095882 |
| C | 3.471636  | 0.408567  | -0.896420 |
| C | 4.532749  | -1.695502 | -0.042398 |
| C | 4.190453  | -1.376203 | -2.487969 |
| H | 2.871440  | 0.871254  | -1.686108 |
| H | 3.017073  | 0.662528  | 0.065988  |
| H | 4.468977  | 0.865421  | -0.923095 |
| H | 4.565928  | -2.791007 | -0.087384 |
| H | 5.550352  | -1.329025 | -0.226278 |
| H | 4.271680  | -1.401912 | 0.979676  |
| H | 5.180293  | -0.910519 | -2.562944 |
| H | 4.311494  | -2.450473 | -2.672488 |
| H | 3.563989  | -0.968158 | -3.289541 |
| C | 0.163511  | 3.957561  | -0.557468 |
| C | -1.239588 | 3.616717  | -1.083710 |
| C | 0.031820  | 4.786133  | 0.733458  |
| C | 0.915383  | 4.795685  | -1.612009 |
| H | -1.188551 | 3.045372  | -2.018328 |
| H | -1.796961 | 3.019708  | -0.355472 |
| H | -1.812760 | 4.531087  | -1.279975 |
| H | 1.012196  | 5.015513  | 1.170421  |
| H | -0.465694 | 5.740956  | 0.523678  |
| H | -0.570584 | 4.266163  | 1.486452  |
| H | 0.372786  | 5.723238  | -1.828909 |
| H | 1.919482  | 5.070572  | -1.264837 |
| H | 1.025257  | 4.246094  | -2.554946 |
| C | -3.904088 | -0.780487 | -0.839847 |
| C | -3.559539 | -2.275591 | -0.909195 |
| C | -5.025333 | -0.528786 | 0.193760  |
| C | -4.446906 | -0.327167 | -2.215349 |
| H | -2.795881 | -2.472656 | -1.666296 |
| H | -3.167588 | -2.658454 | 0.037385  |
| H | -4.458328 | -2.853465 | -1.160300 |
| H | -5.258449 | 0.540762  | 0.276230  |
| H | -5.942607 | -1.042912 | -0.117798 |
| H | -4.781327 | -0.895450 | 1.195307  |
| H | -5.381807 | -0.848805 | -2.451265 |
| H | -4.655185 | 0.750957  | -2.231525 |
| H | -3.729038 | -0.546462 | -3.013937 |
| C | -0.183365 | -2.769765 | -0.670421 |
| O | -0.601414 | -3.500655 | 0.209965  |
| O | -0.380530 | -2.495761 | -1.837454 |



Structure of **25**

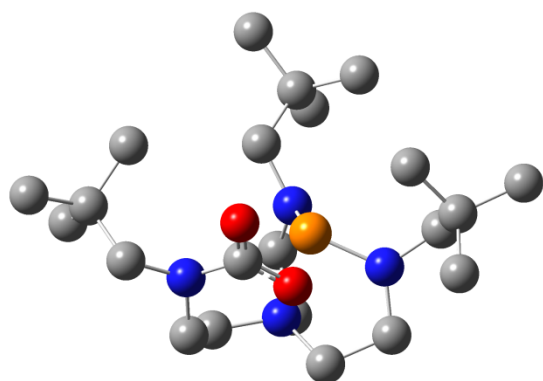

|   |           |           |           |
|---|-----------|-----------|-----------|
| P | -0.652185 | -0.035549 | 0.276496  |
| N | -0.088853 | -0.459612 | 2.137172  |
| N | -2.131962 | -0.796291 | 0.723464  |
| C | -2.198340 | -1.640567 | 1.907998  |
| C | -0.781550 | -1.739993 | 2.486351  |
| C | 1.408778  | -0.487595 | 2.325133  |
| C | 2.243277  | -1.553789 | 1.597698  |
| N | 2.405072  | -1.411721 | 0.160604  |
| N | -0.706855 | 1.650148  | 0.803758  |
| C | -0.579453 | 1.972265  | 2.214353  |
| C | -0.667167 | 0.651822  | 2.975767  |
| C | 3.765488  | -1.390401 | -0.388411 |
| C | -0.179271 | 2.630073  | -0.150153 |
| C | -3.270191 | -0.822568 | -0.202877 |
| H | -2.542847 | -2.650368 | 1.664010  |
| H | -2.911679 | -1.231760 | 2.646689  |
| H | -0.776880 | -1.868862 | 3.574805  |
| H | -0.236921 | -2.537574 | 1.991702  |
| H | 1.766123  | 0.505972  | 2.042747  |
| H | 1.568184  | -0.612386 | 3.404915  |
| H | 3.233050  | -1.458353 | 2.060578  |
| H | 1.872480  | -2.552562 | 1.861376  |
| H | -1.362633 | 2.643292  | 2.591578  |
| H | 0.382057  | 2.479723  | 2.399146  |
| H | -0.139100 | 0.687370  | 3.933621  |
| H | -1.709846 | 0.402903  | 3.168594  |
| H | 4.464529  | -1.784245 | 0.364794  |
| H | 3.767962  | -2.076206 | -1.239881 |
| H | 0.184866  | 2.072854  | -1.023960 |
| H | 0.697807  | 3.128416  | 0.296590  |
| H | -3.380168 | 0.177734  | -0.641523 |
| H | -4.167294 | -0.975723 | 0.414883  |

|   |           |           |           |
|---|-----------|-----------|-----------|
| C | 4.293004  | -0.014414 | -0.875238 |
| C | 3.375065  | 0.548645  | -1.973925 |
| C | 4.384802  | 0.989031  | 0.287541  |
| C | 5.703570  | -0.246911 | -1.450892 |
| H | 3.290256  | -0.148755 | -2.812760 |
| H | 2.362947  | 0.711543  | -1.589613 |
| H | 3.761272  | 1.505776  | -2.348433 |
| H | 5.022045  | 0.611042  | 1.098673  |
| H | 4.810414  | 1.942346  | -0.049968 |
| H | 3.392838  | 1.202911  | 0.702263  |
| H | 6.135194  | 0.690717  | -1.821900 |
| H | 6.386511  | -0.649953 | -0.691312 |
| H | 5.676249  | -0.956044 | -2.286872 |
| C | -1.153785 | 3.725452  | -0.666052 |
| C | -2.333733 | 3.083274  | -1.413619 |
| C | -1.689004 | 4.595596  | 0.486033  |
| C | -0.351798 | 4.613786  | -1.638039 |
| H | -1.986289 | 2.466025  | -2.251312 |
| H | -2.921281 | 2.445729  | -0.744742 |
| H | -3.002415 | 3.852281  | -1.819224 |
| H | -0.871730 | 5.022107  | 1.082098  |
| H | -2.281811 | 5.431060  | 0.094156  |
| H | -2.338892 | 4.020994  | 1.154900  |
| H | -0.986186 | 5.404674  | -2.055076 |
| H | 0.494447  | 5.097095  | -1.133407 |
| H | 0.047399  | 4.029475  | -2.475965 |
| C | -3.287506 | -1.859049 | -1.367263 |
| C | -2.236479 | -1.514680 | -2.441346 |
| C | -3.028315 | -3.291062 | -0.865750 |
| C | -4.695267 | -1.774184 | -1.992501 |
| H | -2.347868 | -0.479369 | -2.790635 |
| H | -1.215179 | -1.658301 | -2.077059 |
| H | -2.364737 | -2.169120 | -3.312735 |
| H | -3.752959 | -3.591387 | -0.096170 |
| H | -3.123105 | -4.002115 | -1.695674 |
| H | -2.011766 | -3.381497 | -0.470200 |
| H | -4.777602 | -2.454817 | -2.847593 |
| H | -5.475990 | -2.049180 | -1.271004 |
| H | -4.914637 | -0.761025 | -2.354230 |
| C | 1.381161  | -2.013642 | -0.651928 |
| O | 0.275448  | -2.199379 | -0.010026 |
| O | 1.612606  | -2.249797 | -1.838295 |
